# Supplementary material for: Transition-metal catalyzed oxidative spirocyclization of N-aryl alkynamides with methylarenes under microwave irradiation
Source: Royal Society of Chemistry journal article supplement (doi:10.1039/d1ob01970h), 2021-01-01
Supplement: d1ob01970h1.pdf [file d1ob01970h1.pdf]

# Supporting Information

## Transition-Metal Catalyzed Benzyl Spirocyclization of *N*-Aryl Alkynamides with Methylarenes under Microwave Irradiation

Jinwei Yuan,<sup>a,\*</sup> Chenxu Mou,<sup>a</sup> Yang Zhang,<sup>a</sup> Wenyu Hu,<sup>a</sup> Liangru Yang,<sup>a,\*</sup> Yongmei Xiao,<sup>a</sup> Pu Mao<sup>a</sup>,  
Shouren Zhang,<sup>b,\*</sup> Lingbo Qu<sup>c</sup>

<sup>a</sup> School of Chemistry & Chemical Engineering, Henan University of Technology, Zhengzhou 450001, P. R. China

<sup>b</sup> Henan Key Laboratory of Nanocomposites and Applications; Institute of Nanostructured Functional Materials, Huanghe Science and Technology College, Zhengzhou 450006, P. R. China

<sup>c</sup> College of Chemistry, Zhengzhou University, Zhengzhou 450001, P. R. China

**\*Corresponding authors:**

**E-mail:** [yuanjinweigs@126.com](mailto:yuanjinweigs@126.com) (Jinwei Yuan)

---

## Contents

|                                                                                                         |    |
|---------------------------------------------------------------------------------------------------------|----|
| 1 General information .....                                                                             | 1  |
| 2 Screening the reaction conditions.....                                                                | 1  |
| 3 Copies of spectra of products.....                                                                    | 3  |
| 4 HR MS spectrum of the adduct 7 of TEMPO and benzyl radical .....                                      | 39 |
| 5 HR MS spectrum of the adduct 8 of ethene-1,1-diylidibenzene and <i>m</i> -methyl benzyl radical ..... | 40 |
| 6 Kinetic isotope effect experiments .....                                                              | 40 |

## 1 General information

All chemicals were commercially available and used as received without further. Column chromatography was performed using 300-400 mesh silica. Nuclear magnetic resonance spectra were recorded on Bruker Avance 400 MHz spectrometer. Chemical shifts for  $^1\text{H}$  NMR spectra are recorded in parts per million from tetramethylsilane. Data were reported as follows: chemical shift, multiplicity (s = singlet, d = doublet, t = triplet, m = multiplet and br = broad), coupling constant in Hz and integration. Chemical shifts for  $^{13}\text{C}$  NMR spectra were recorded in parts per million from tetramethylsilane. Chemical shifts for  $^{19}\text{F}$  NMR spectra were recorded in parts per million with fluorobenzene as external standard. High resolution mass spectra (HR MS) were obtained on Thermo Scientific LTQ Orbitrap XL instrument using the ESI technique. IR spectra were recorded on WQF-510 Fourier transform infrared spectrophotometer. Melting points were measured on an XT4A microscopic apparatus uncorrected.

## 2 Screening the reaction conditions

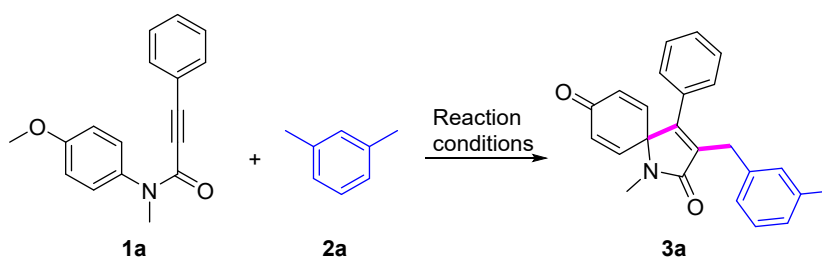

**Table S1** Screening the ratio of **1a** and **2a**<sup>a</sup>

| Entry | the ratio of <b>1a</b> (mmol)<br>and <b>2a</b> (mL) | Yields (%) <sup>b</sup> |
|-------|-----------------------------------------------------|-------------------------|
| 1     | 0.2 : 0.5                                           | 42                      |
| 2     | 0.2 : 1.0                                           | 28                      |
| 3     | 0.2 : 1.5                                           | 23                      |
| 4     | 0.2 : 2.0                                           | 15                      |

<sup>a</sup> Reaction conditions: *N*-(4-methoxyphenyl)-*N*-methyl-3-phenylpropionamide **1a** (0.2 mmol, 53.0 mg), *m*-xylene **2a**,  $\text{AgNO}_3$  (0.04 mmol, 6.8 mg),  $\text{CuBr}$  (0.03 mmol, 4.3 mg), and TBPB (0.4 mmol, 77.6 mg) at 130 °C under microwave irradiation for 30 mins. <sup>b</sup> Isolated yield.

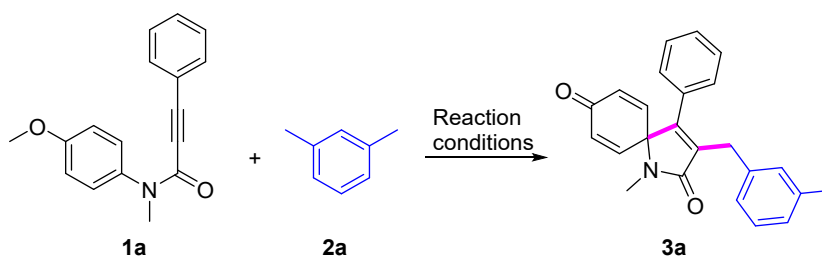

**Table S2** Screening of different solvents<sup>a</sup>

| Entry | Solvent          | Yields (%) <sup>b</sup> |
|-------|------------------|-------------------------|
| 1     | MeCN             | 0                       |
| 2     | DMSO             | 0                       |
| 3     | DMF              | 0                       |
| 4     | <i>m</i> -xylene | 42                      |

<sup>a</sup> Reaction conditions: *N*-(4-methoxyphenyl)-*N*-methyl-3-phenylpropionamide **1a** (0.2 mmol, 53.0 mg), *m*-xylene **2a** (0.5 mL), AgNO<sub>3</sub> (0.04 mmol, 6.8 mg), CuBr (0.03 mmol, 4.3 mg), and TBPB (0.4 mmol, 77.6 mg) at 130 °C under microwave irradiation for 30 mins. <sup>b</sup> Isolated yield.

### 3 Copies of spectra of products

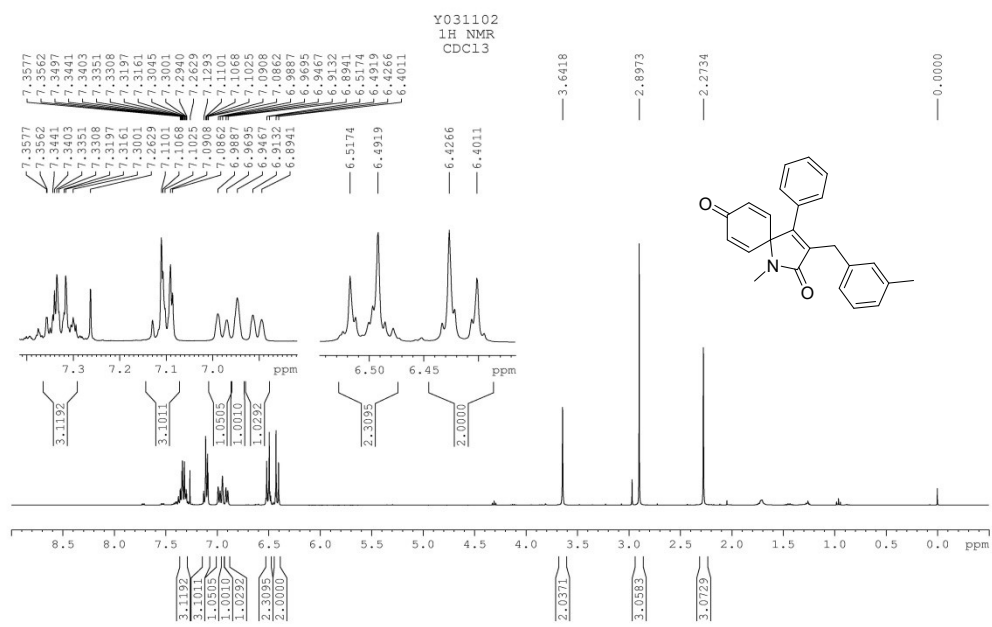

Fig. 1 <sup>1</sup>H NMR spectrum of compound 3a

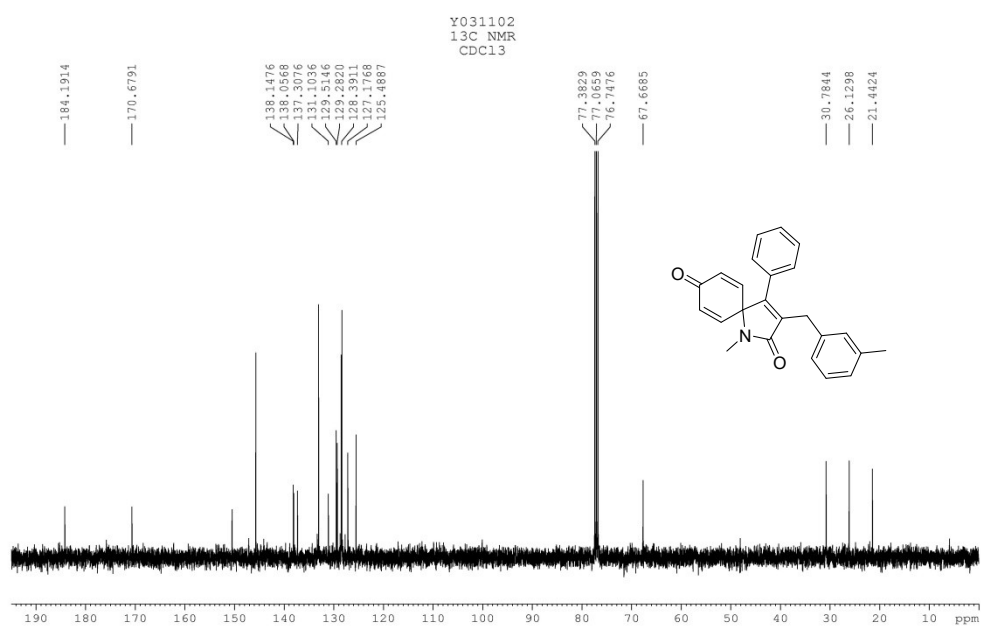

Fig. 2 <sup>13</sup>C NMR spectrum of compound 3a

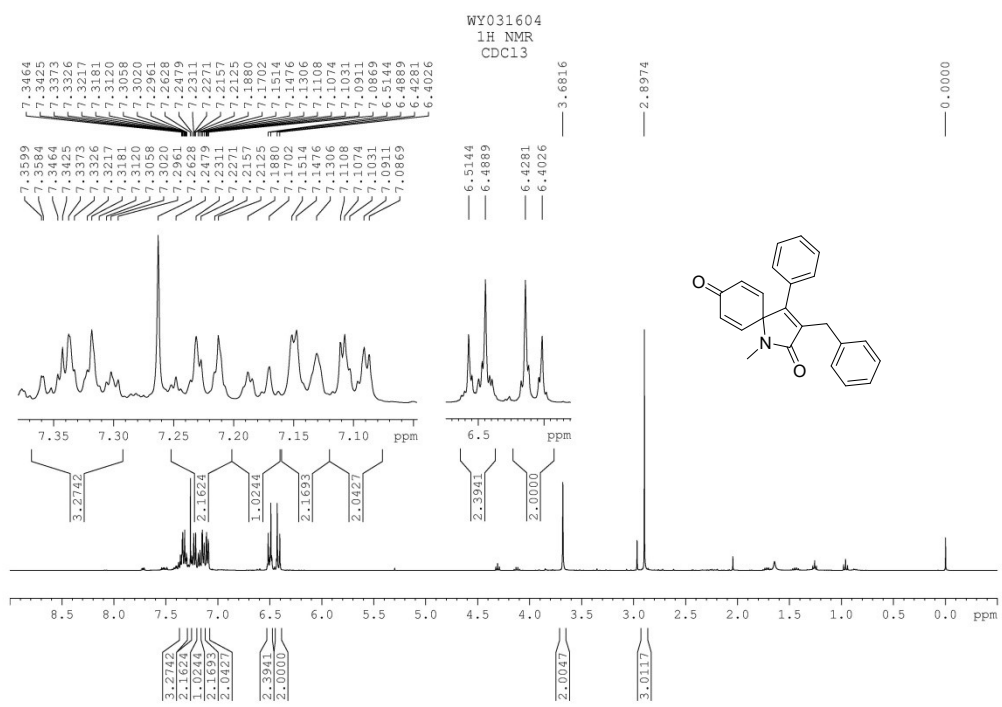

Fig. 3 <sup>1</sup>H NMR spectrum of compound 3b

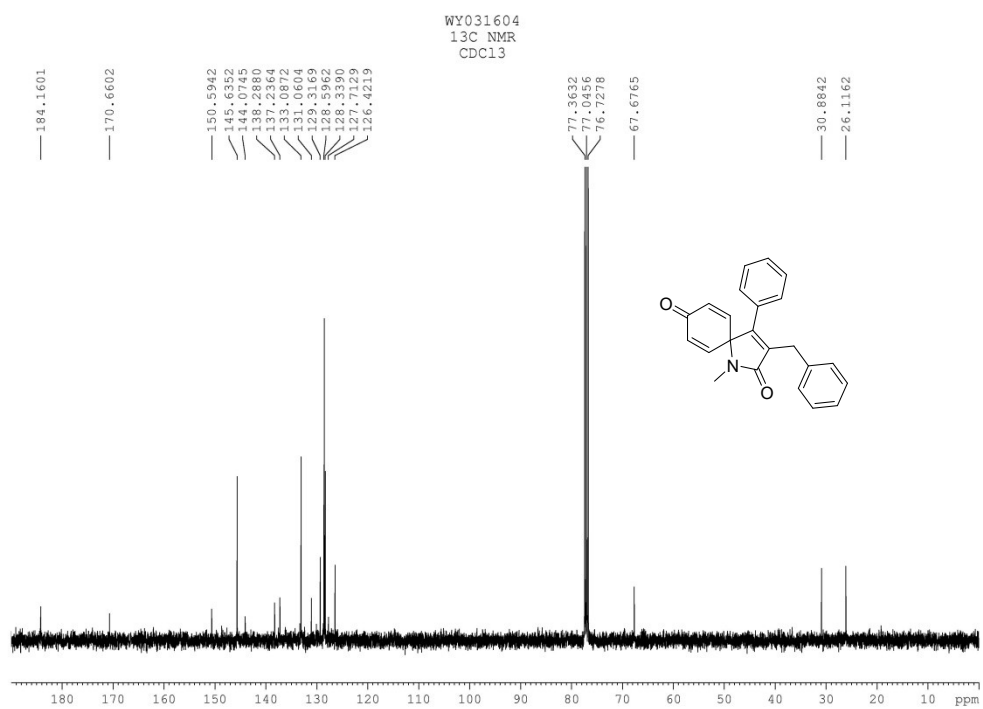

Fig. 4 <sup>13</sup>C NMR spectrum of compound 3b

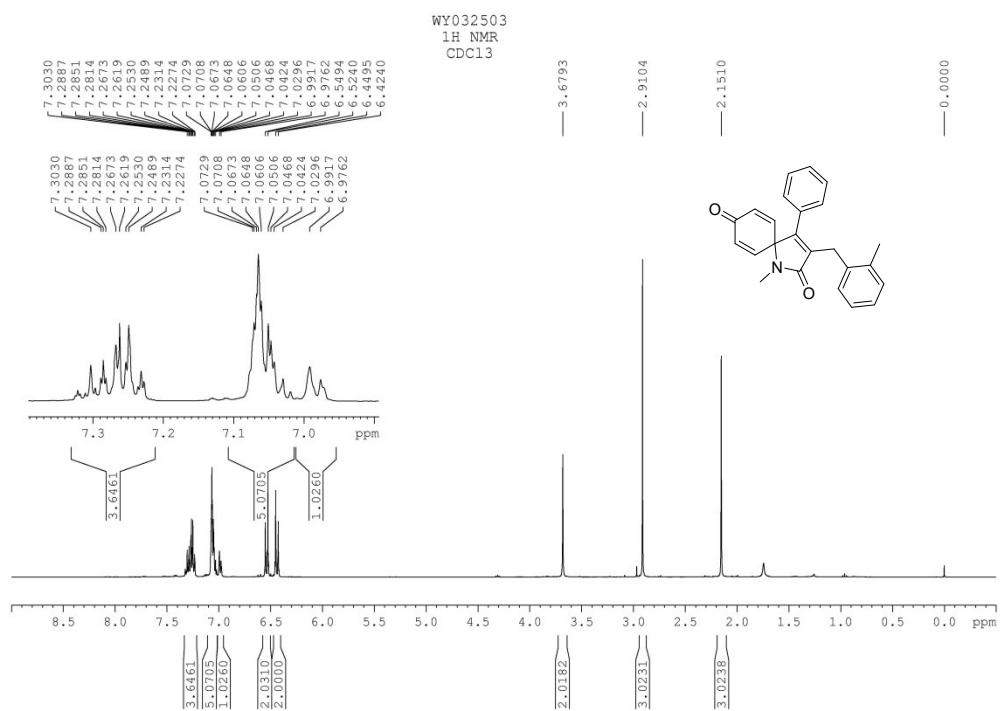

Fig. 5 <sup>1</sup>H NMR spectrum of compound 3c

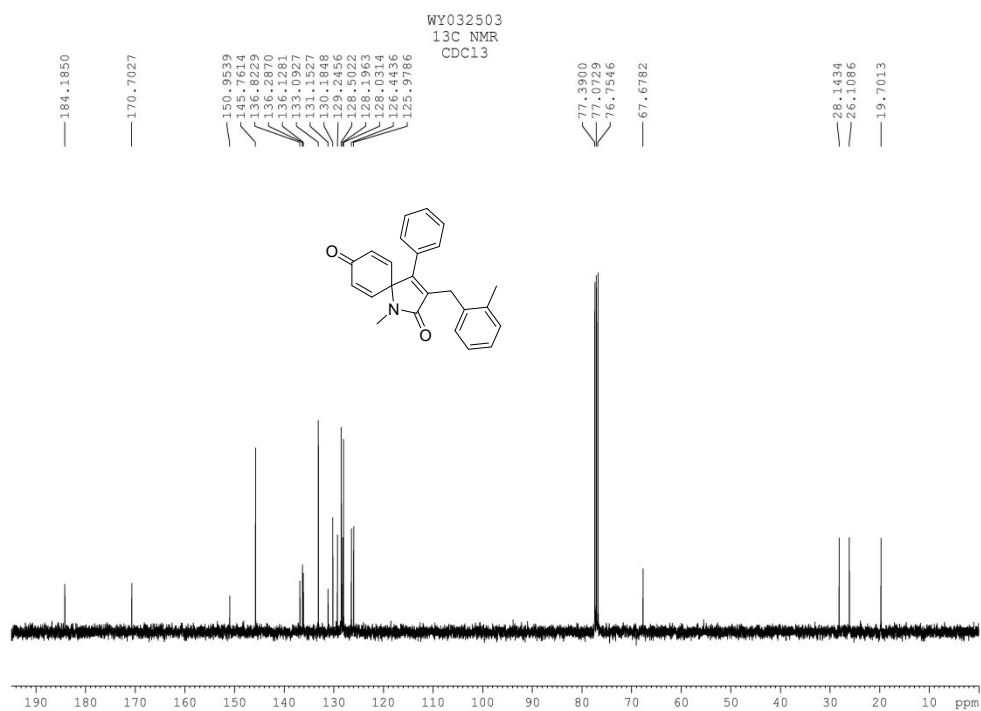

Fig. 6 <sup>13</sup>C NMR spectrum of compound 3c

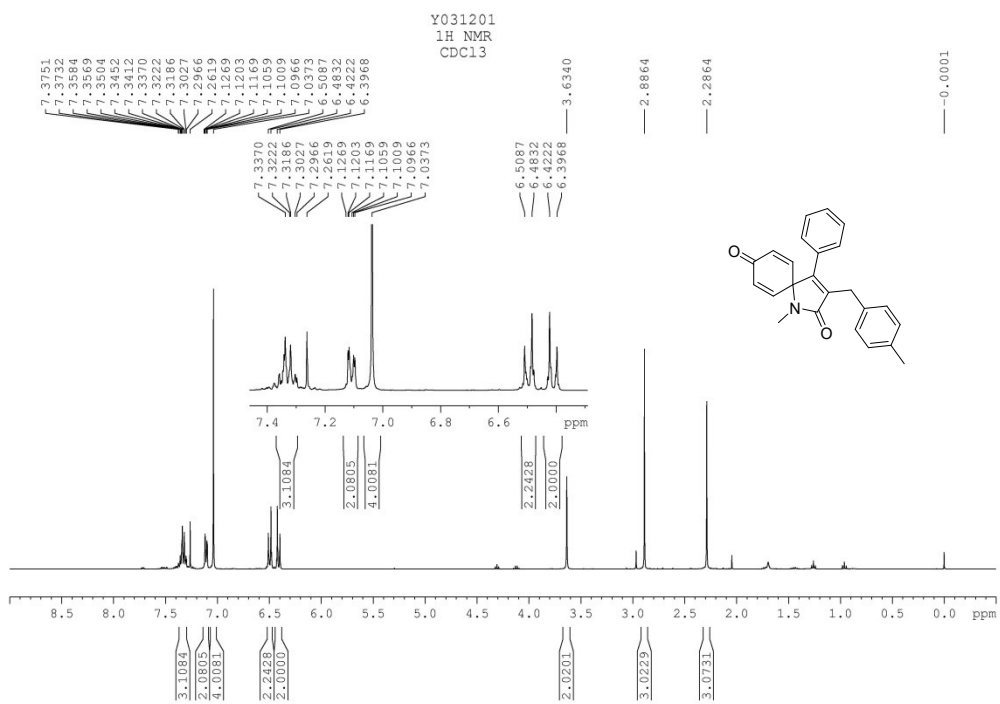

Fig. 7 <sup>1</sup>H NMR spectrum of compound 3d

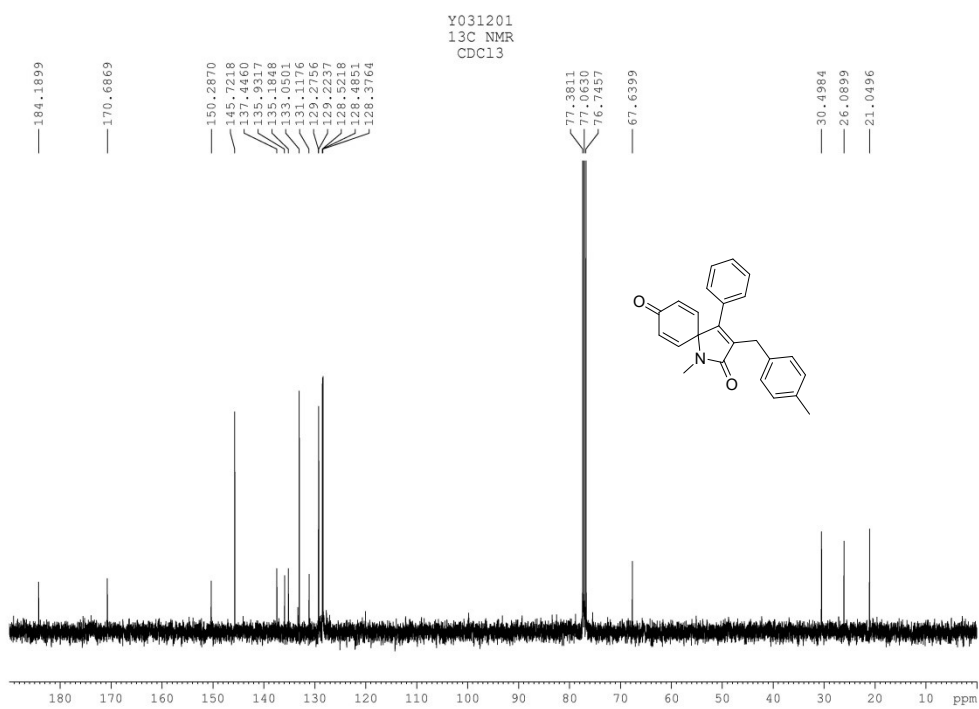

Fig. 8 <sup>13</sup>C NMR spectrum of compound 3d

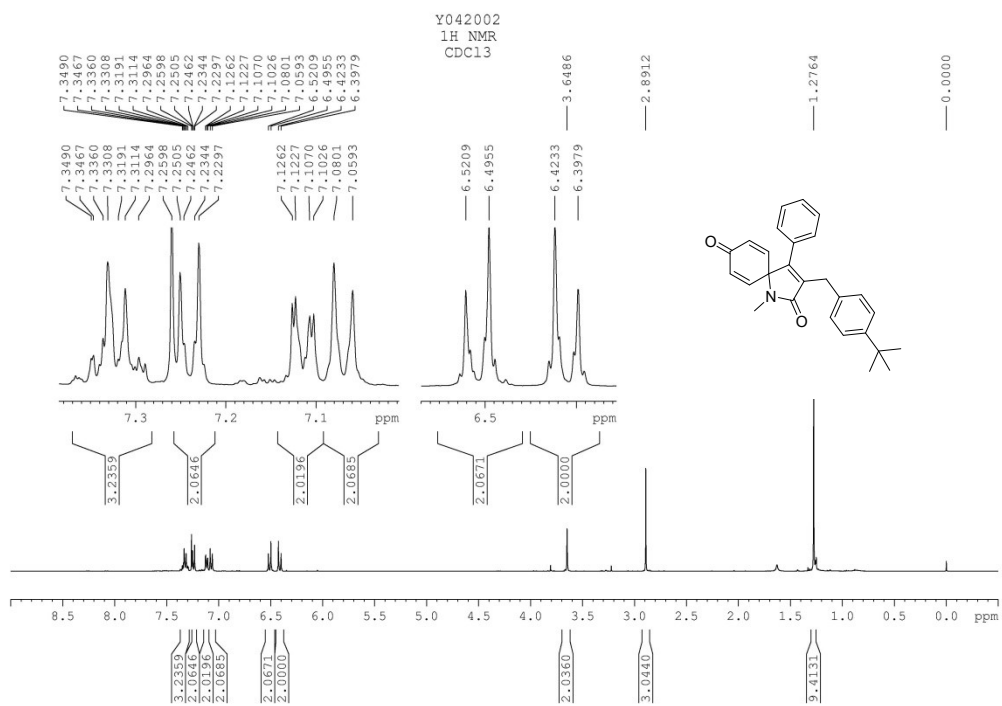

Fig. 9 <sup>1</sup>H NMR spectrum of compound 3e

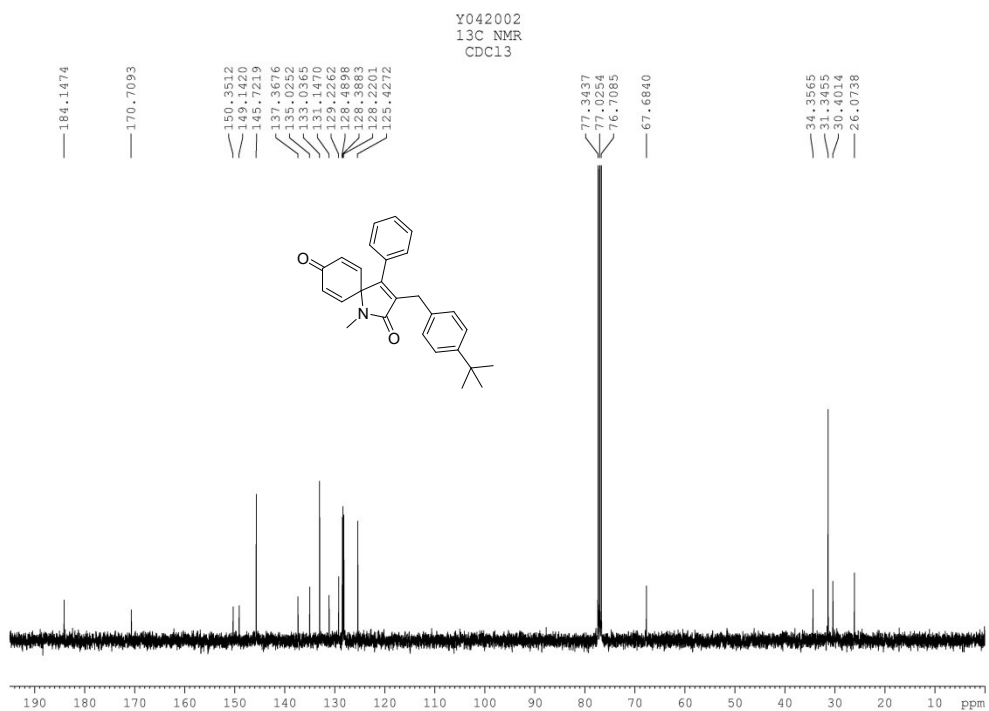

Fig. 10 <sup>13</sup>C NMR spectrum of compound 3e



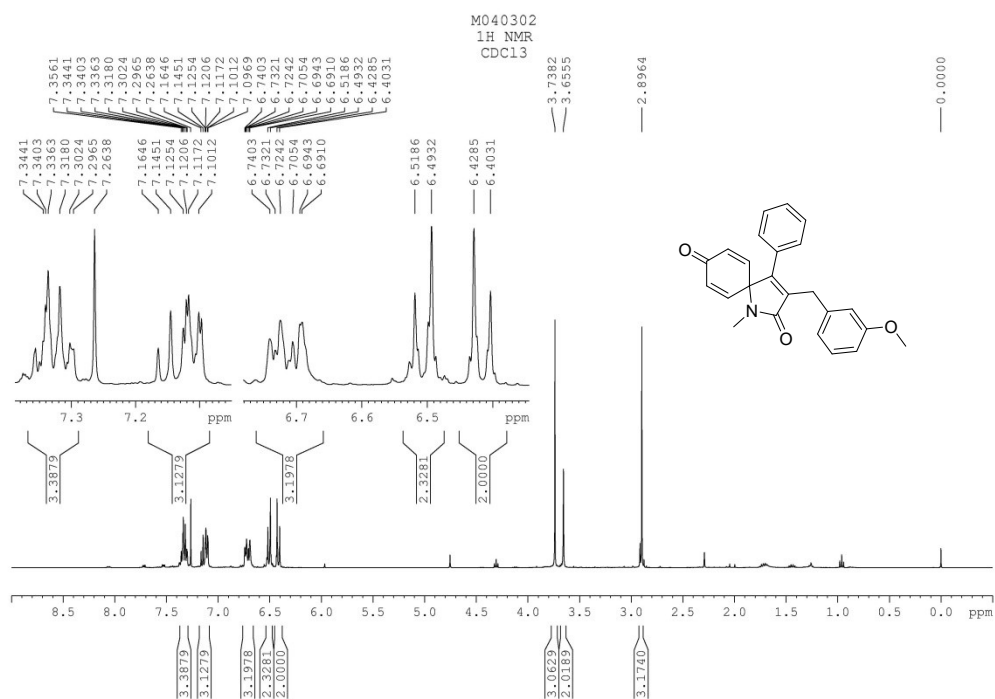

Fig. 11 <sup>1</sup>H NMR spectrum of compound 3f

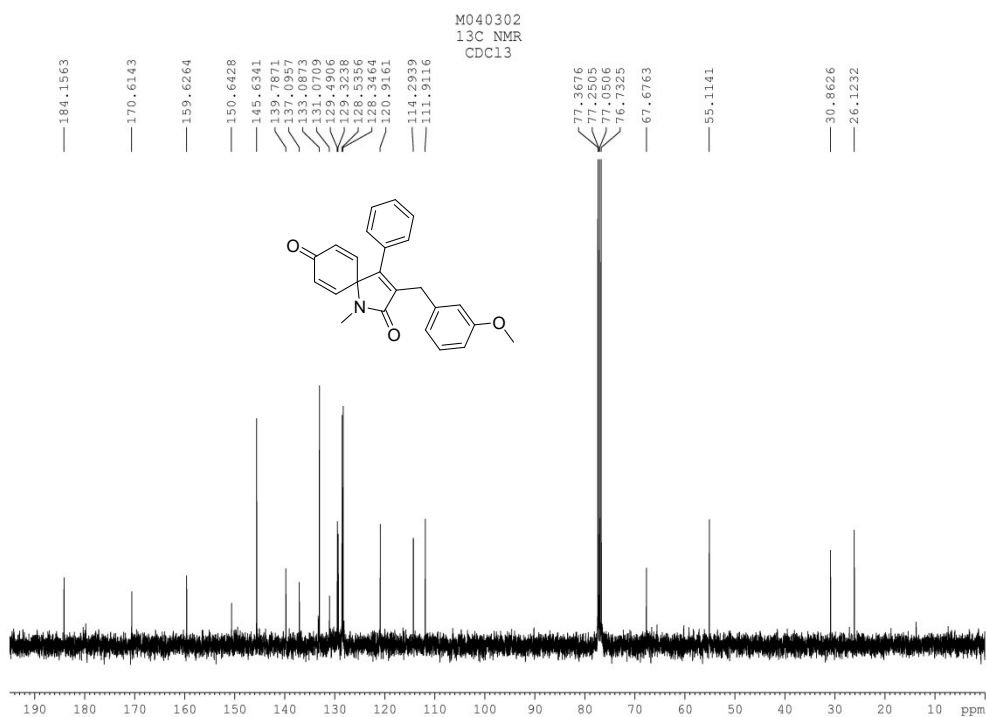

Fig. 12 <sup>13</sup>C NMR spectrum of compound 3f

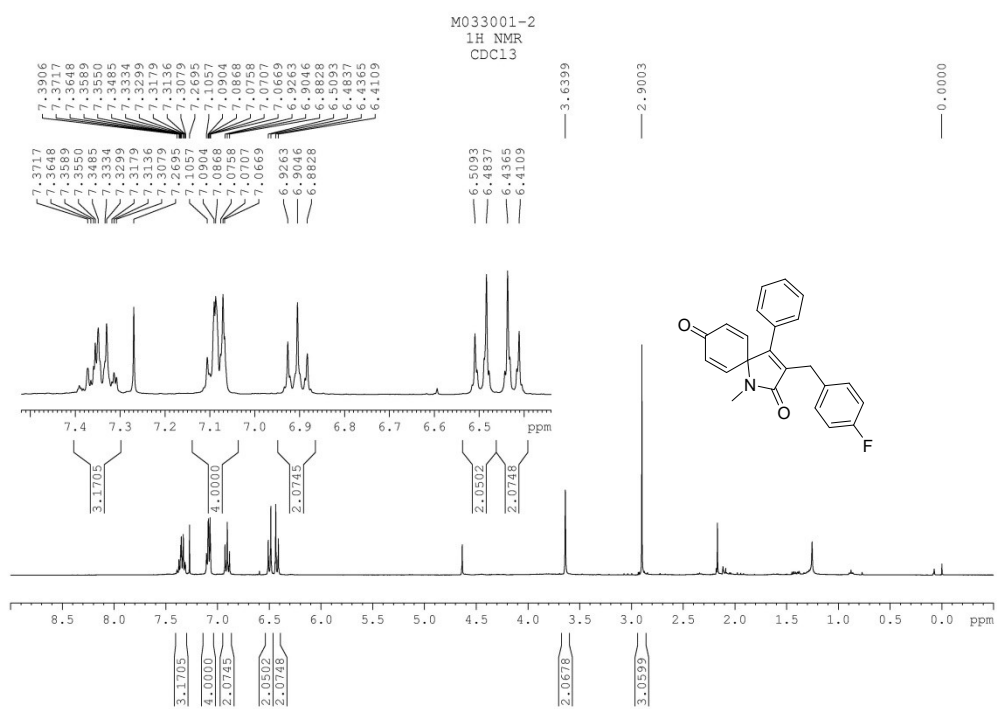

Fig. 13 <sup>1</sup>H NMR spectrum of compound **3g**

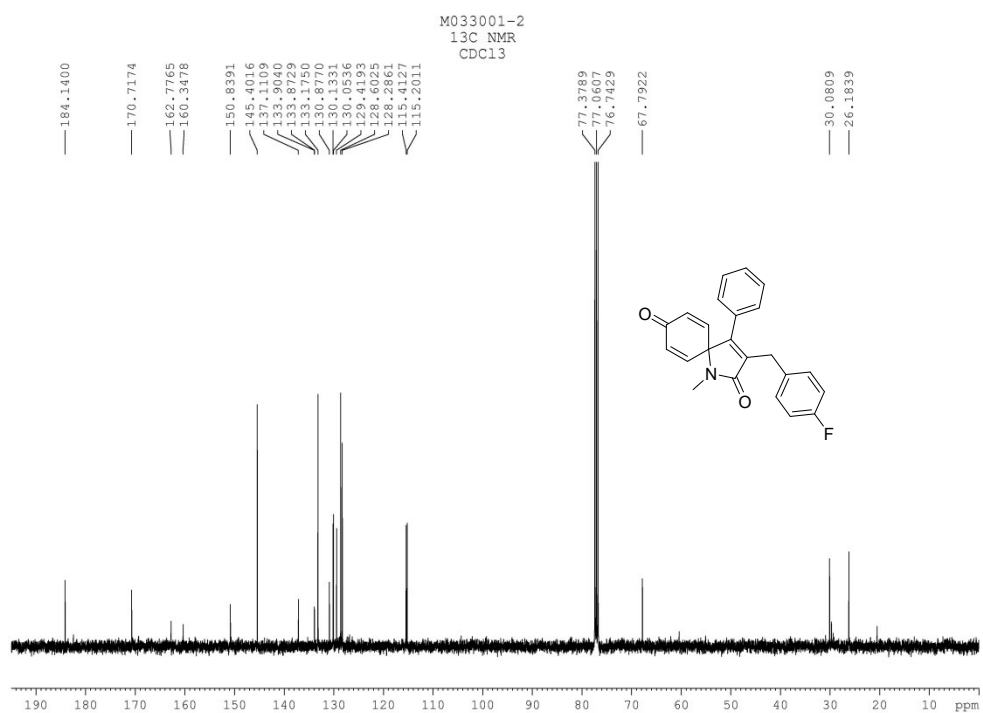

Fig. 14 <sup>13</sup>C NMR spectrum of compound **3g**

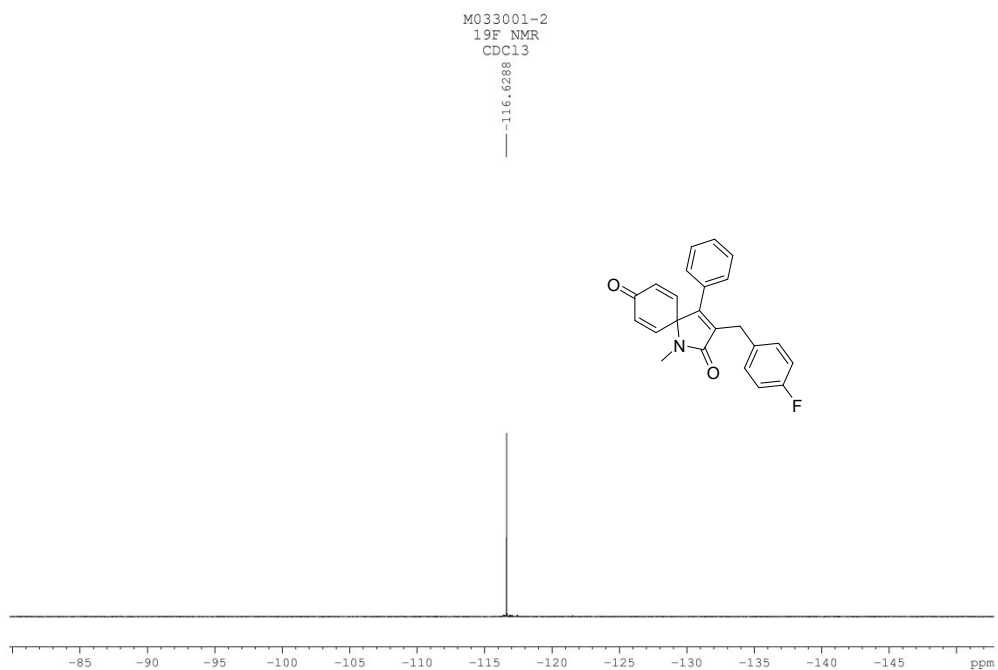

Fig. 15 <sup>19</sup>F NMR spectrum of compound 3g

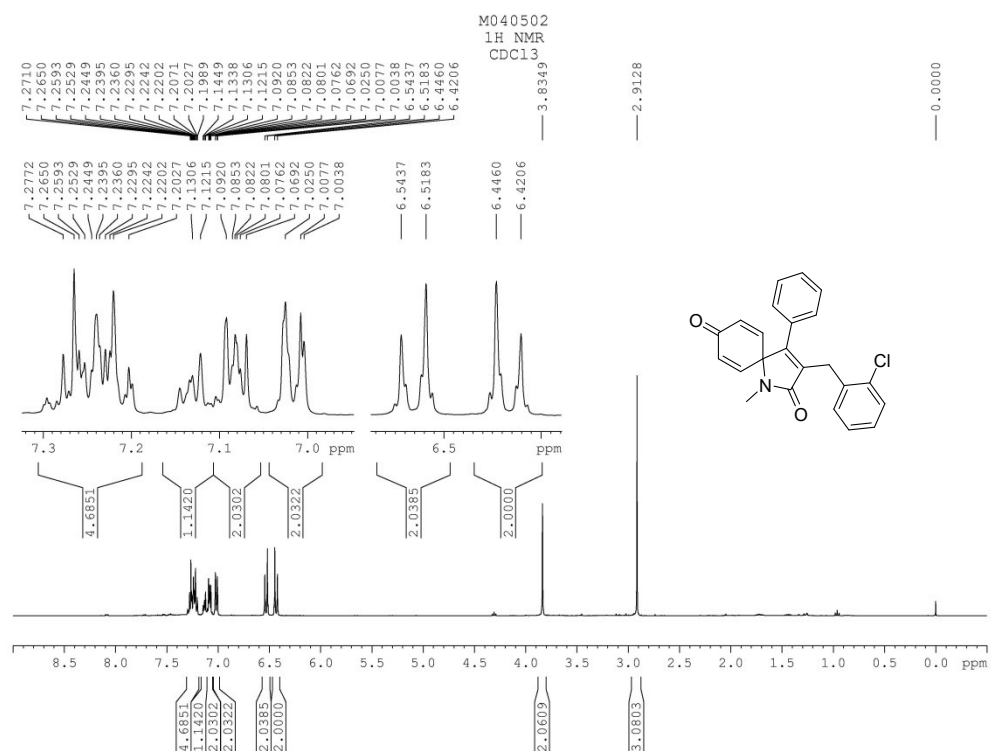

Fig. 16 <sup>1</sup>H NMR spectrum of compound 3h

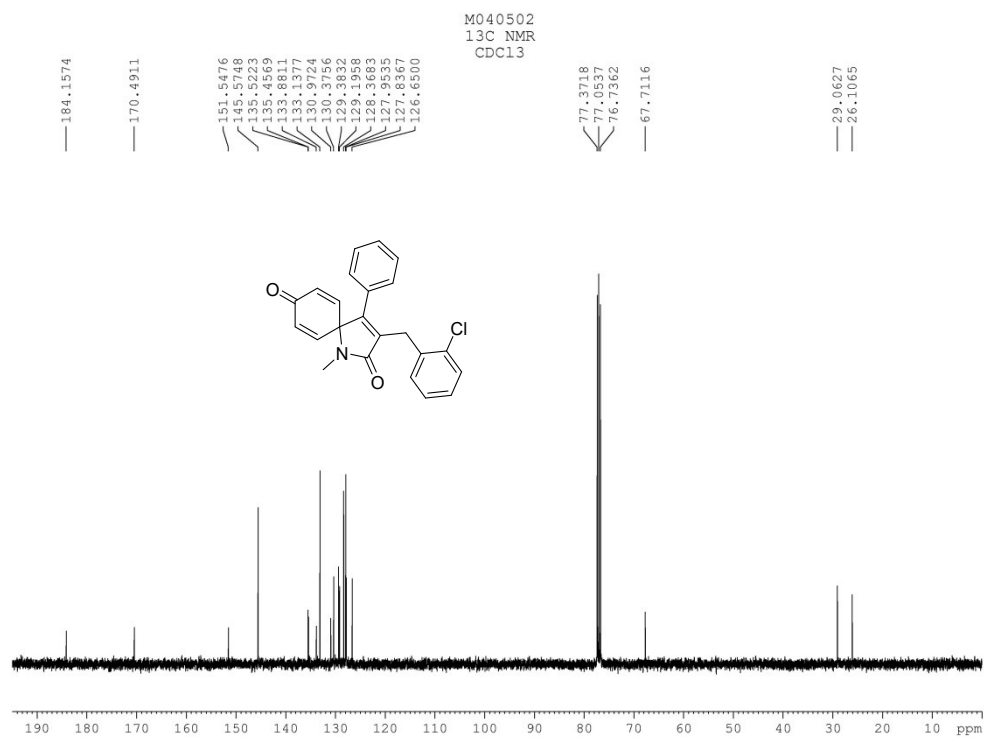

Fig. 17 <sup>13</sup>C NMR spectrum of compound 3h

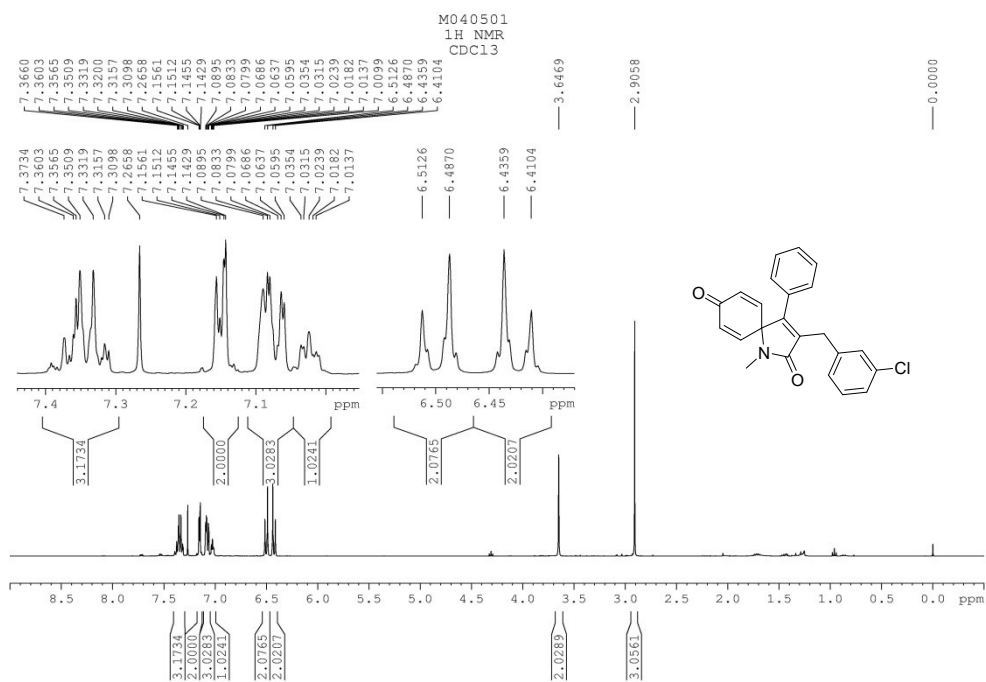

Fig. 18 <sup>1</sup>H NMR spectrum of compound 3i

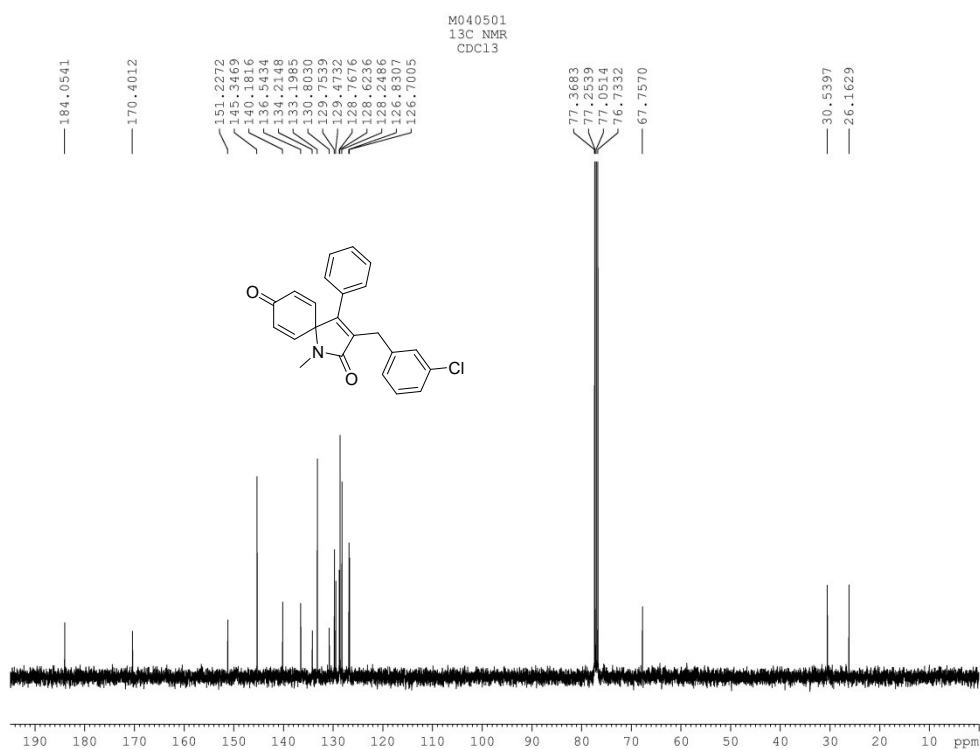

Fig. 19 <sup>13</sup>C NMR spectrum of compound 3i

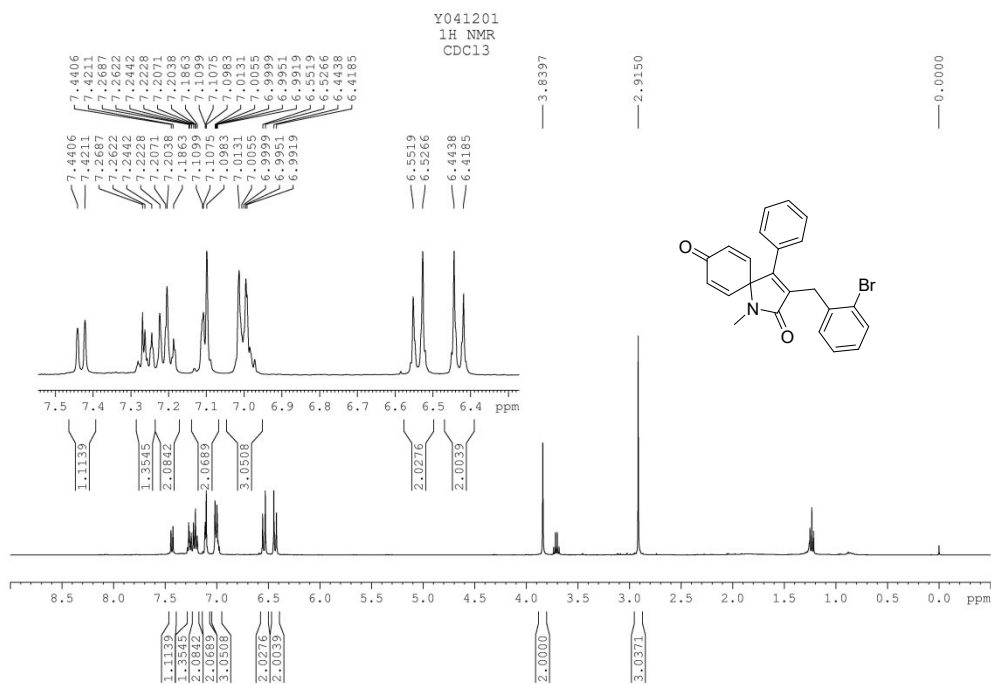

Fig. 20 <sup>1</sup>H NMR spectrum of compound 3j

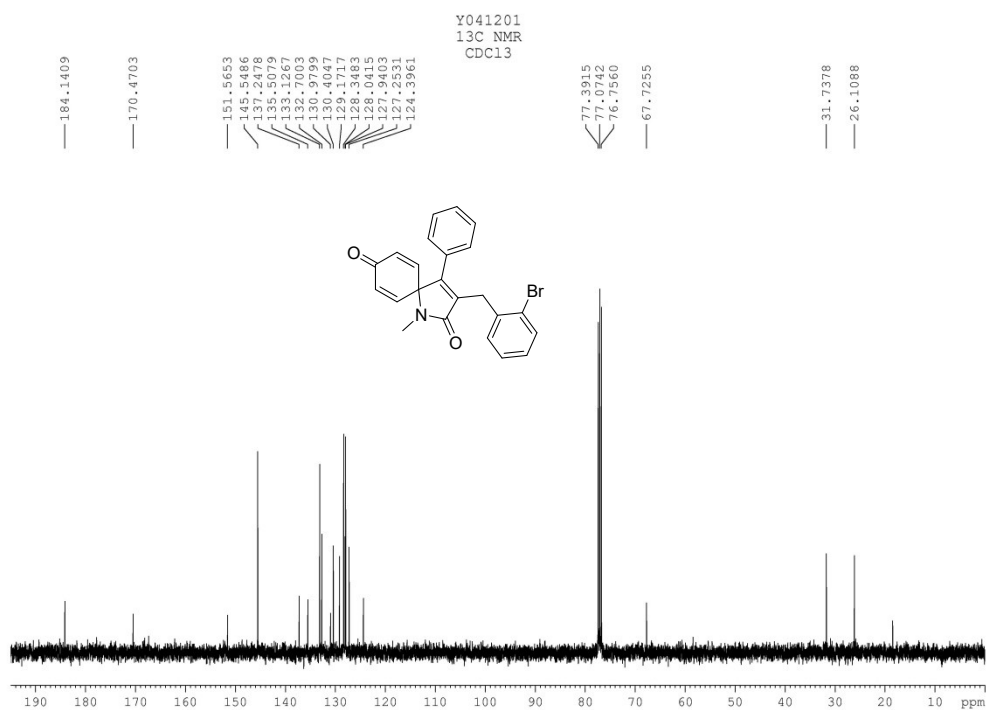

Fig. 21 <sup>13</sup>C NMR spectrum of compound 3j

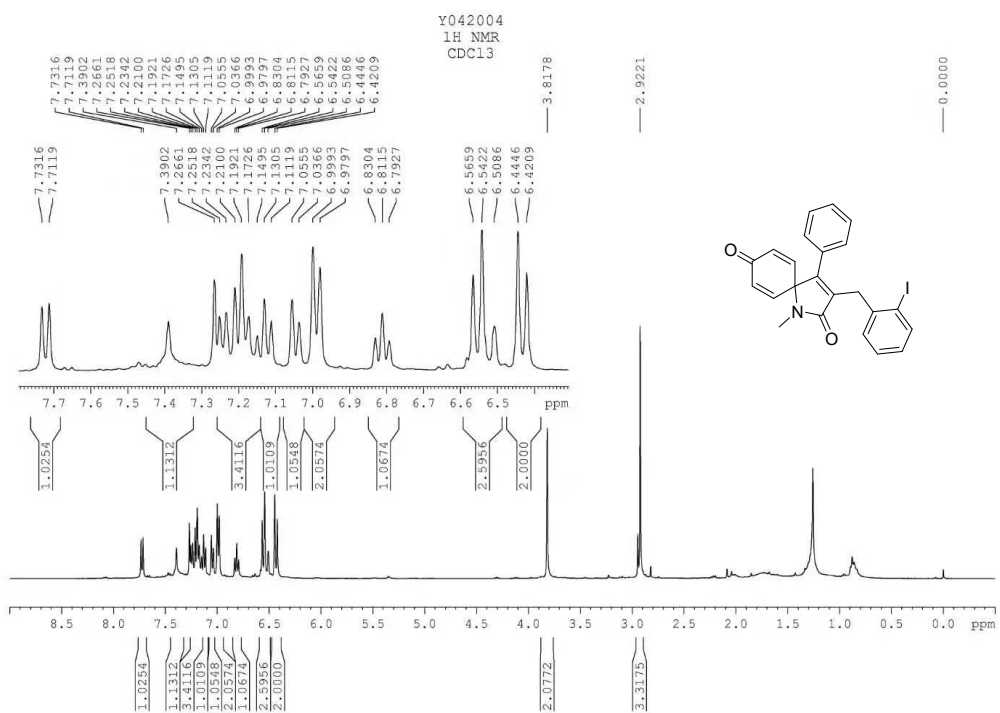

Fig. 22 <sup>1</sup>H NMR spectrum of compound 3k

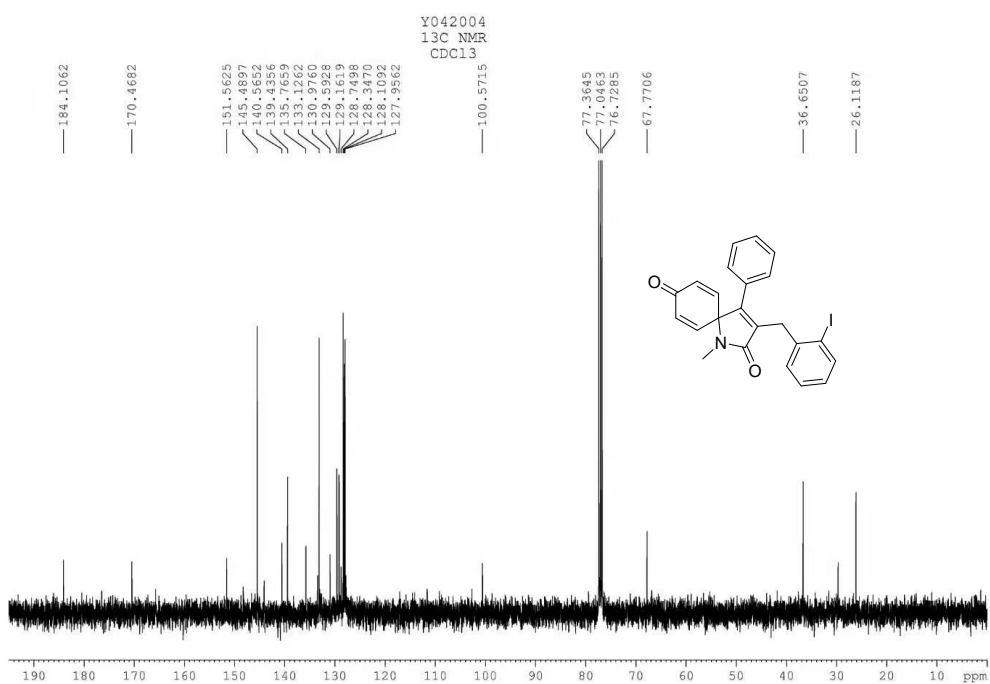

Fig. 23 <sup>13</sup>C NMR spectrum of compound 3k

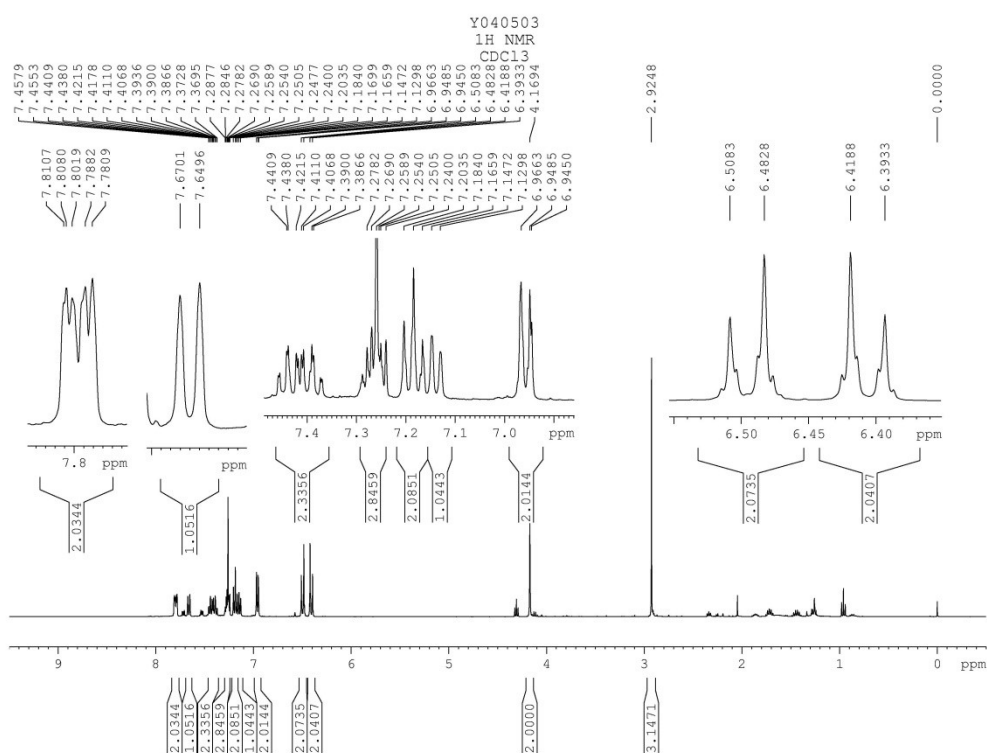

Fig. 24 <sup>1</sup>H NMR spectrum of compound 3l

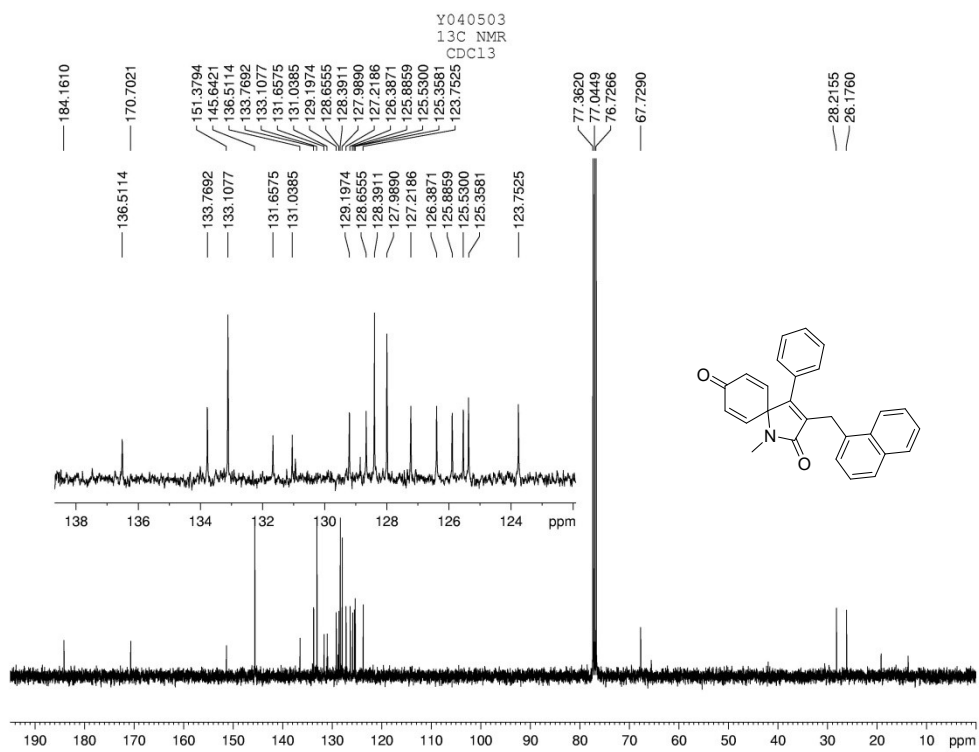

Fig. 25 <sup>13</sup>C NMR spectrum of compound 3l

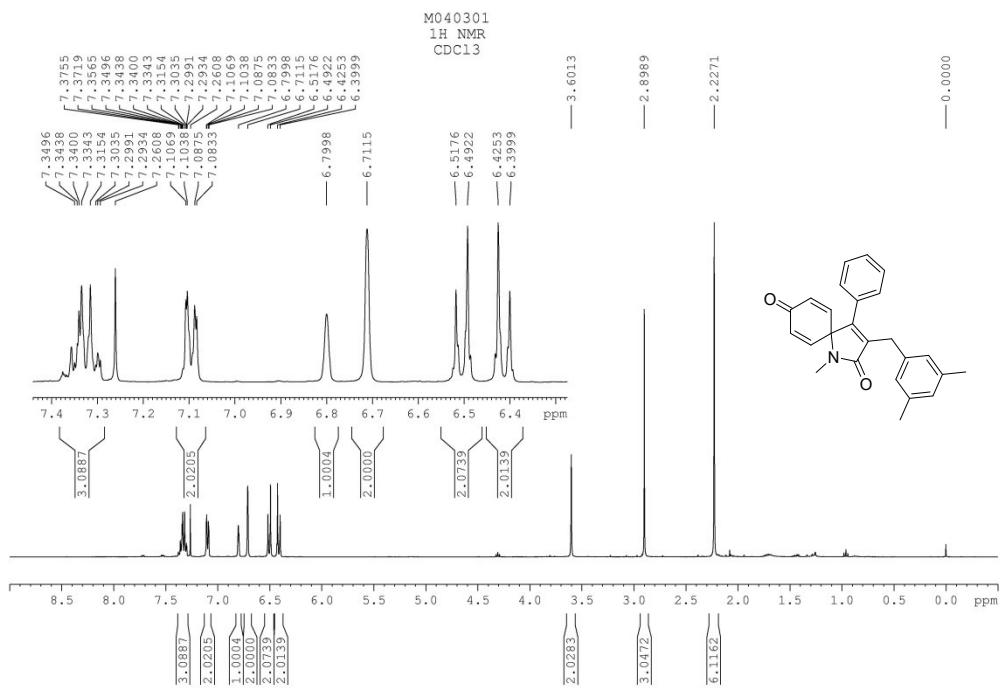

Fig. 26 <sup>1</sup>H NMR spectrum of compound 3m



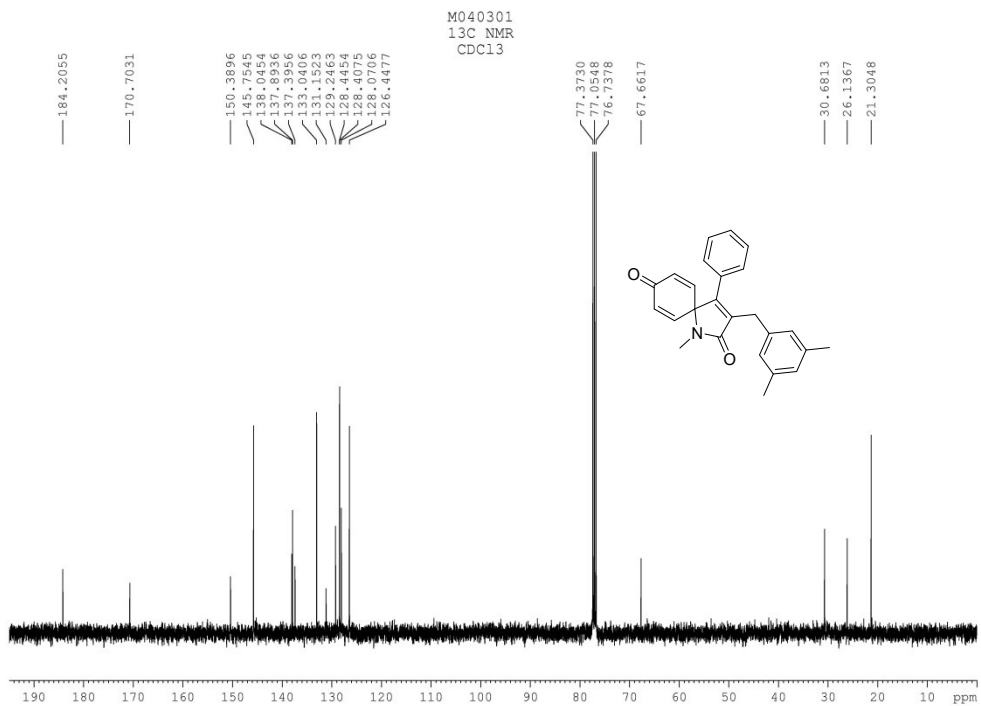

Fig. 27 <sup>13</sup>C NMR spectrum of compound 3m

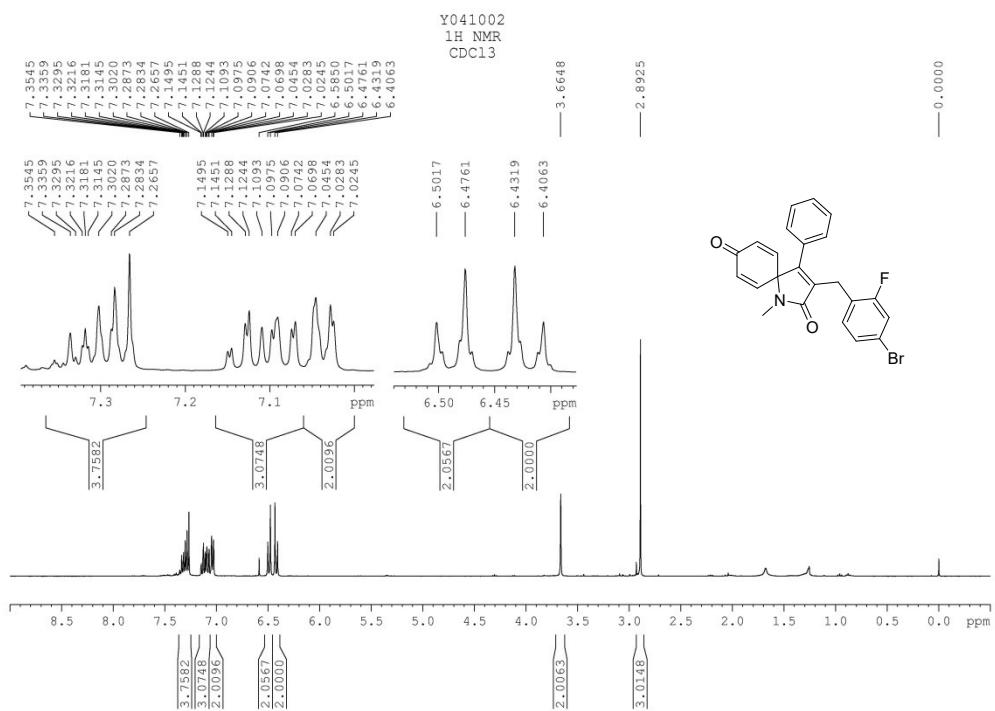

Fig. 28 <sup>1</sup>H NMR spectrum of compound 3n

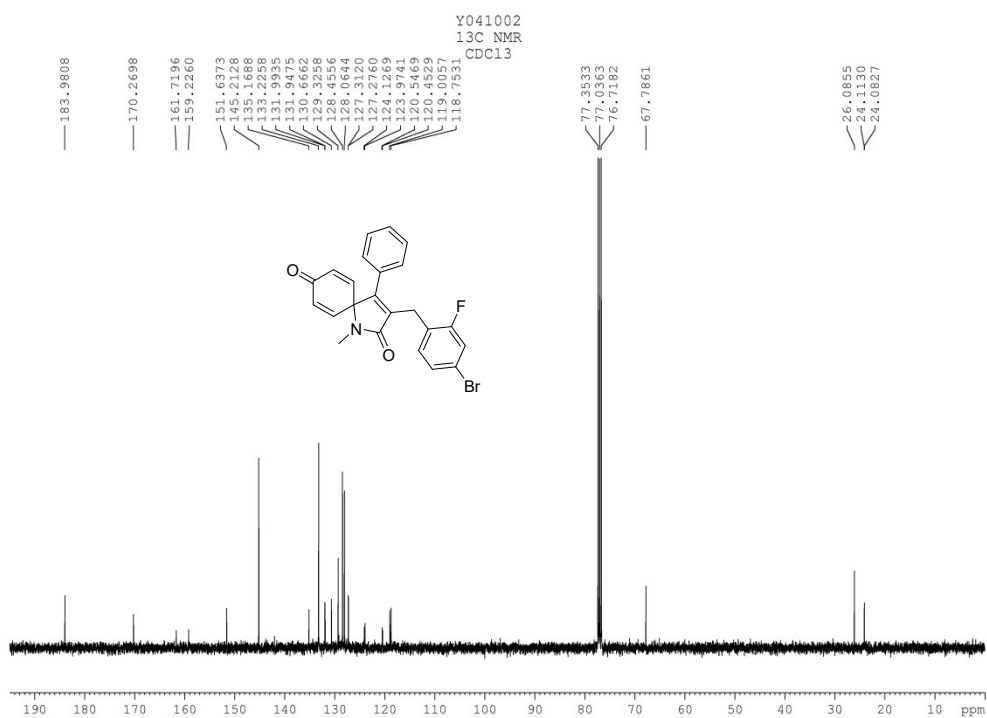

Fig. 29 <sup>13</sup>C NMR spectrum of compound 3n

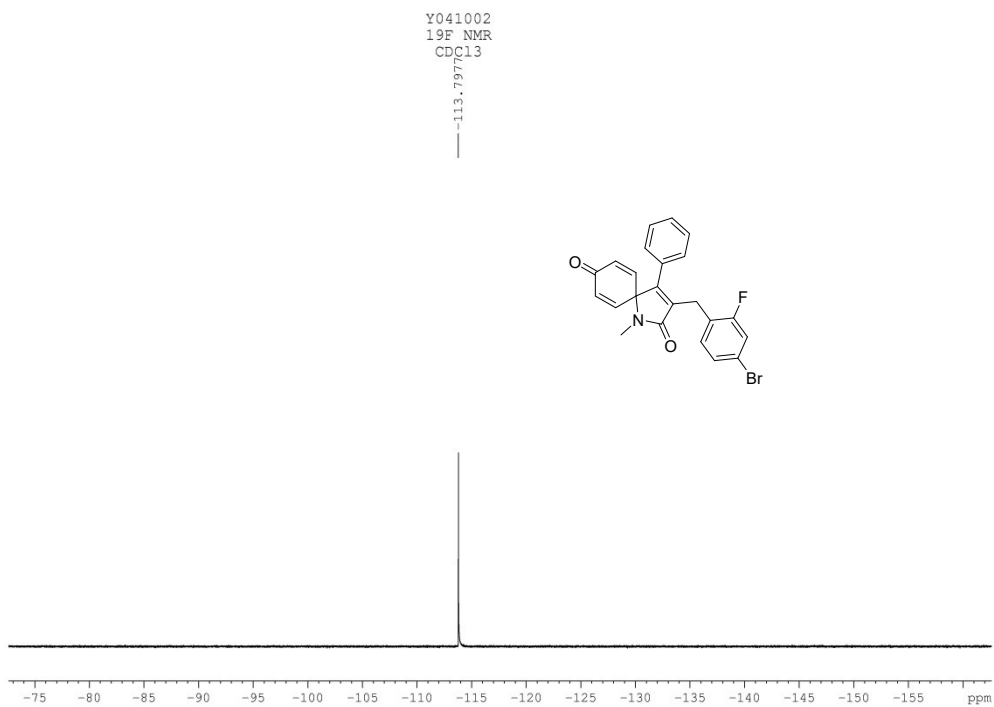

Fig. 30 <sup>19</sup>F NMR spectrum of compound 3n

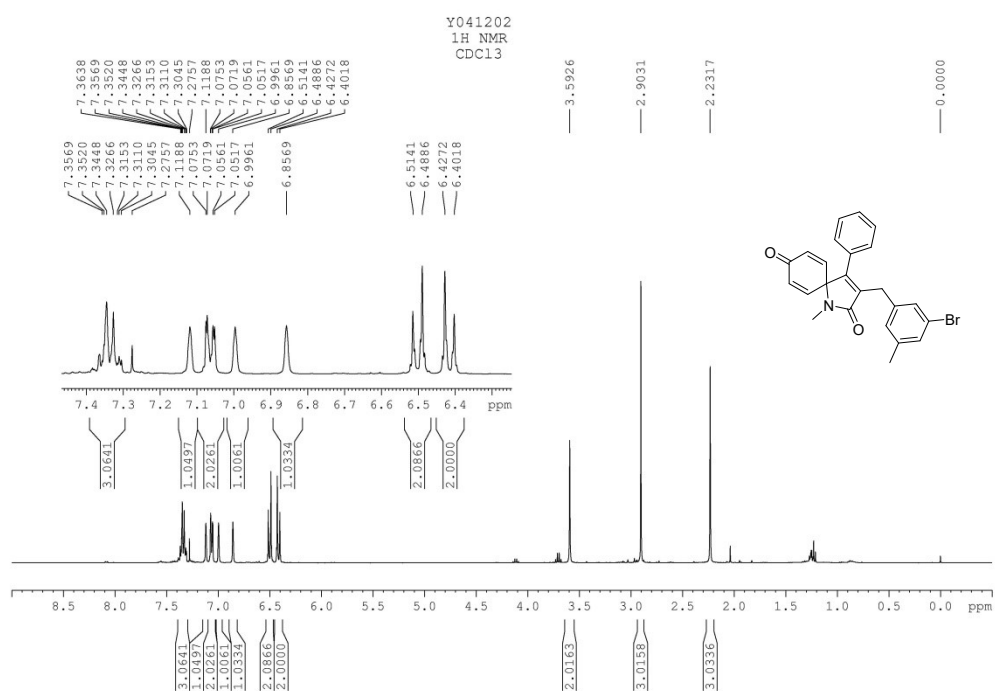

Fig. 31 <sup>1</sup>H NMR spectrum of compound 3o

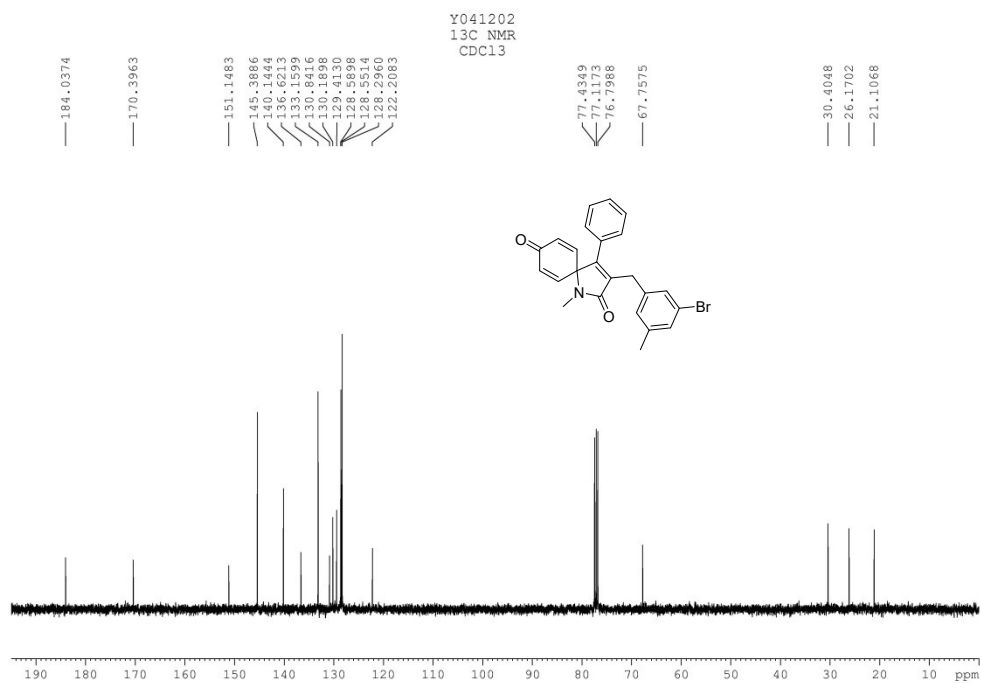

Fig. 32 <sup>13</sup>C NMR spectrum of compound 3o



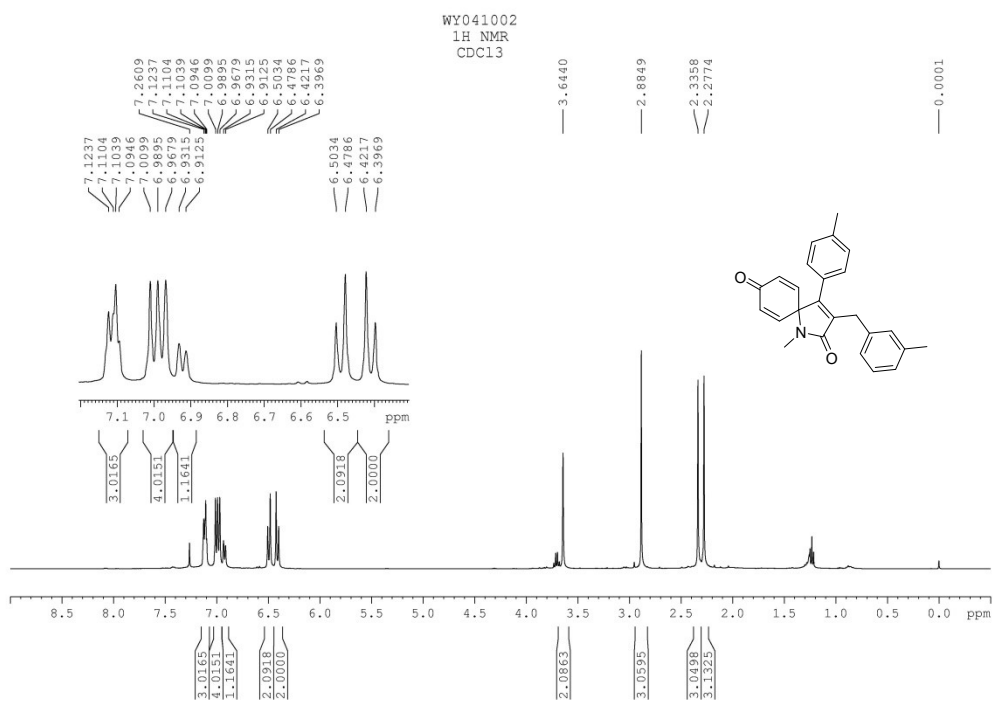

Fig. 35 <sup>1</sup>H NMR spectrum of compound 3s

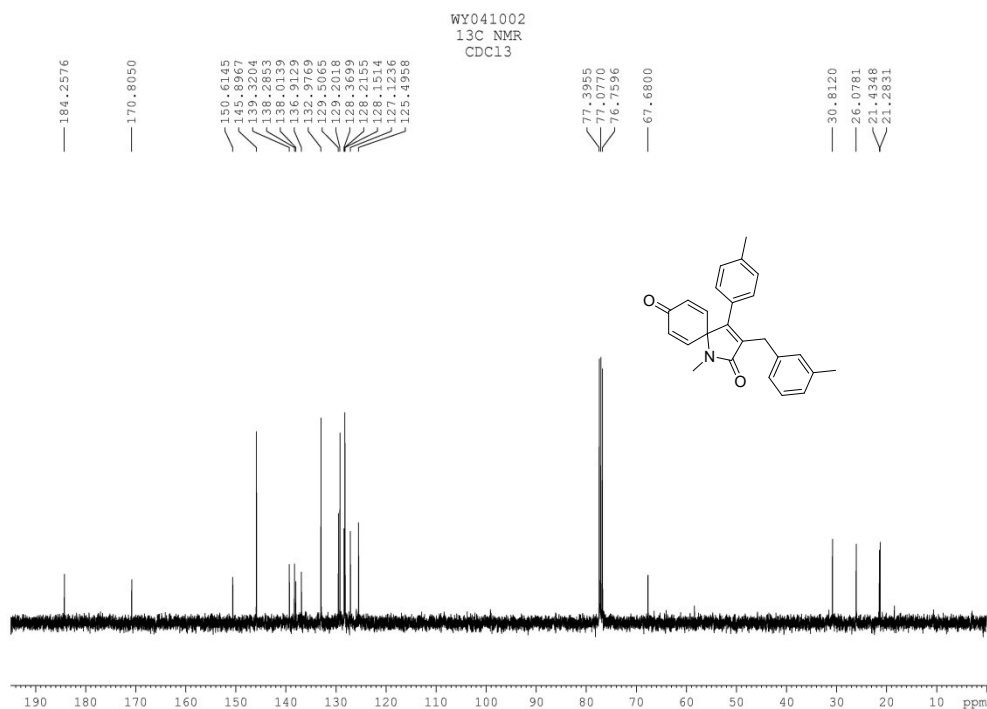

Fig. 36 <sup>13</sup>C NMR spectrum of compound 3s

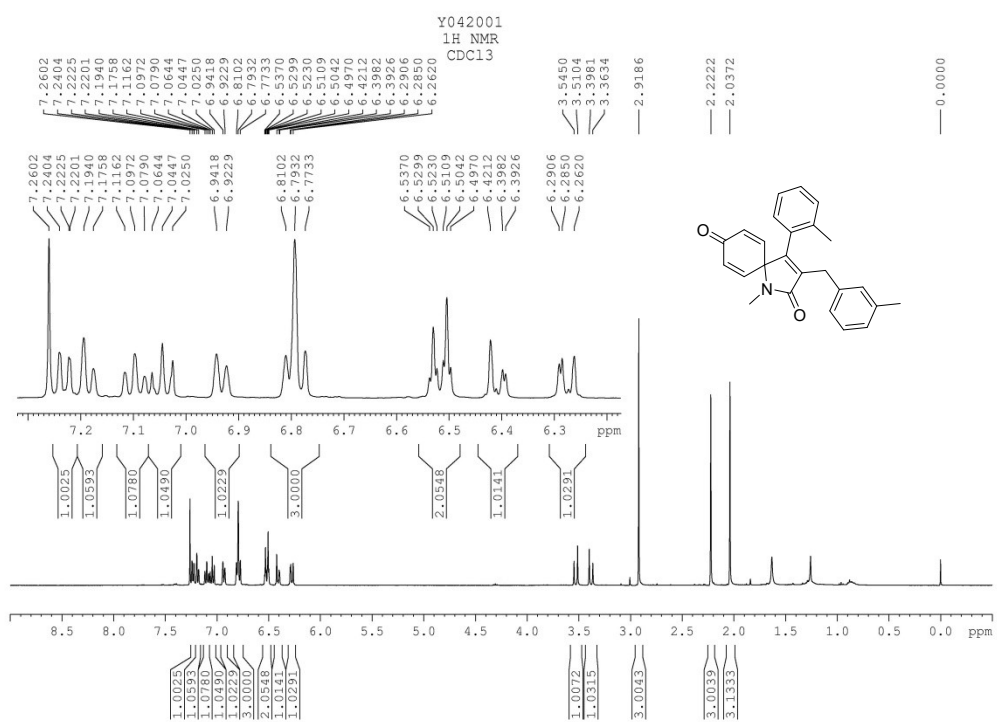

Fig. 37 <sup>1</sup>H NMR spectrum of compound 3t

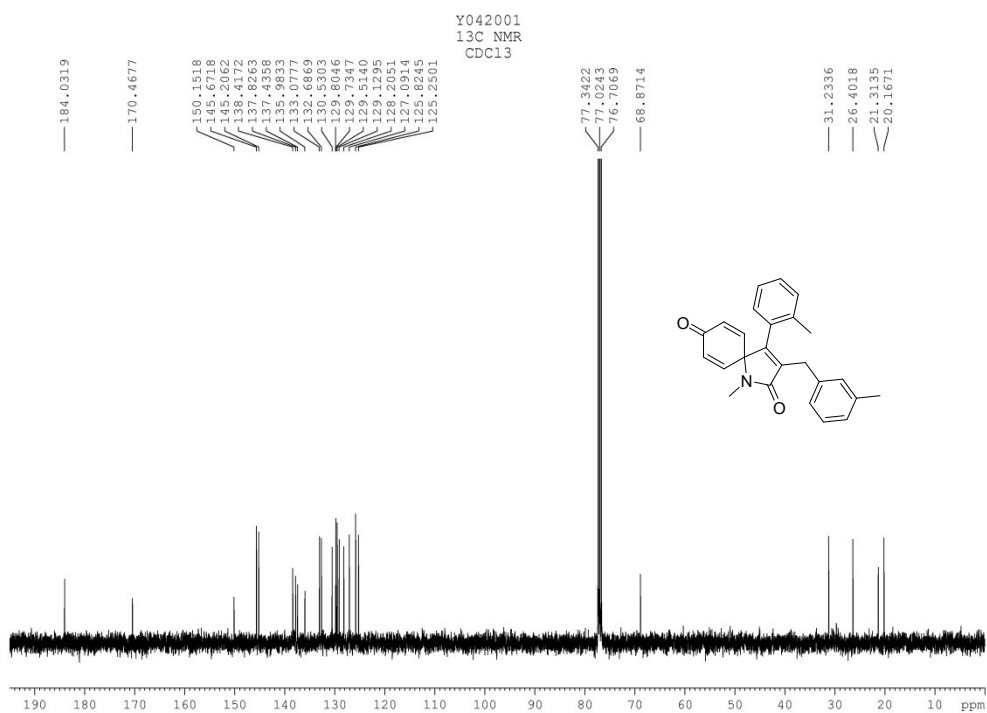

Fig. 38 <sup>13</sup>C NMR spectrum of compound 3t

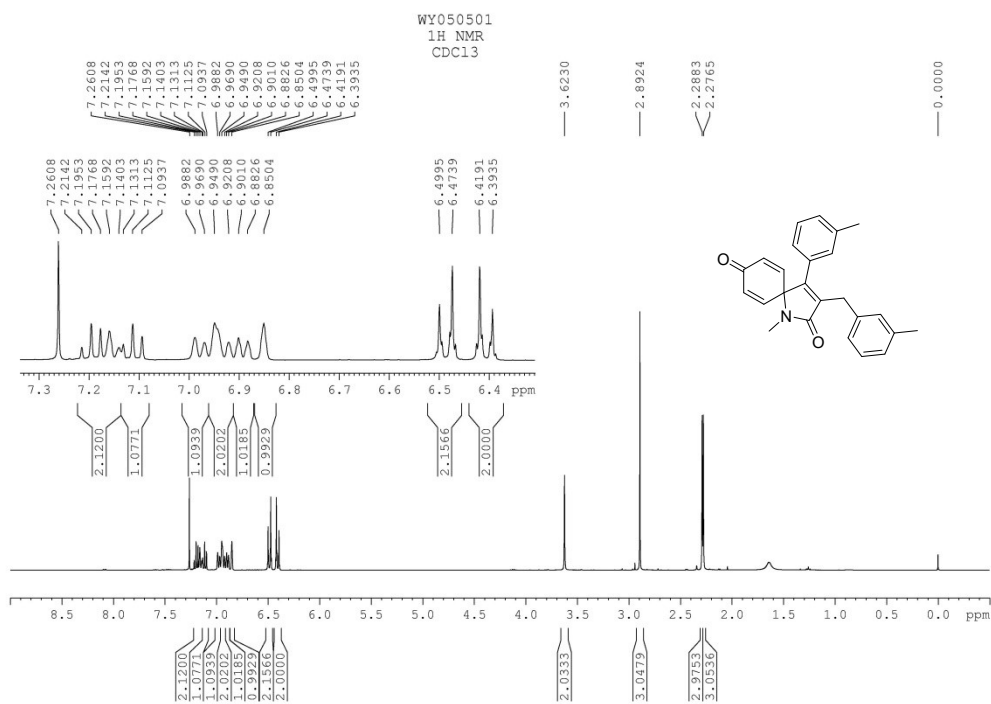

Fig. 39 <sup>1</sup>H NMR spectrum of compound 3u

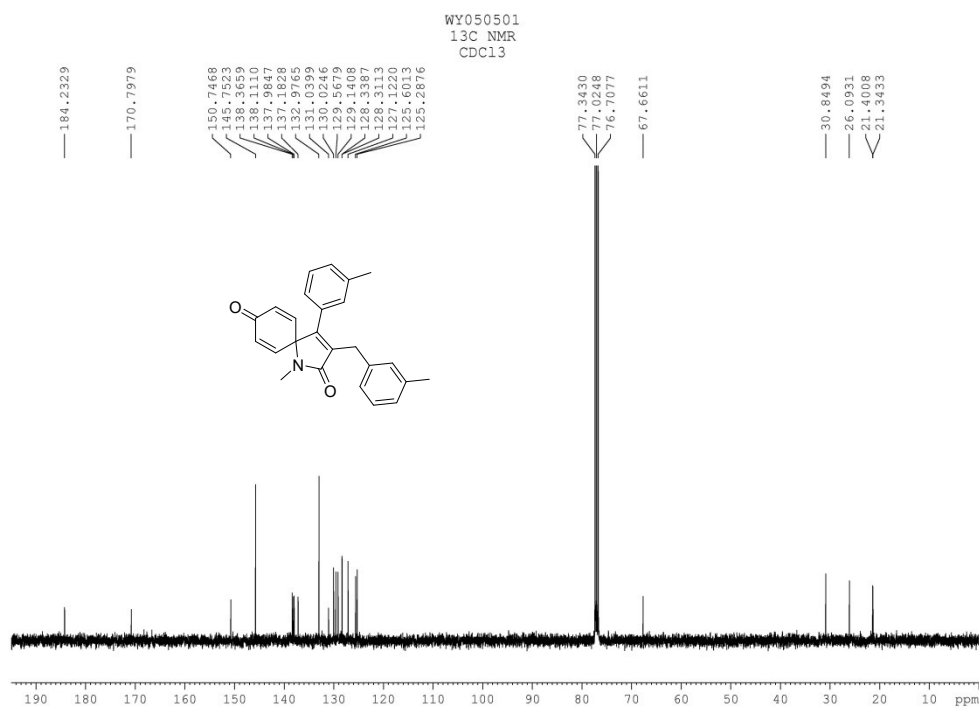

Fig. 40 <sup>13</sup>C NMR spectrum of compound 3u

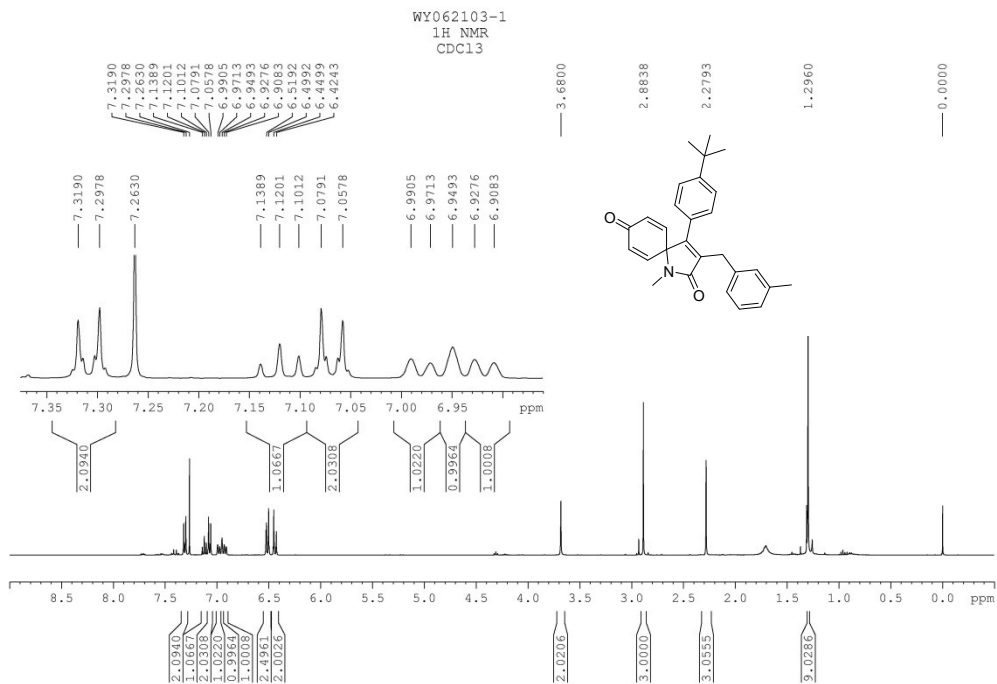

Fig. 41 <sup>1</sup>H NMR spectrum of compound 3v

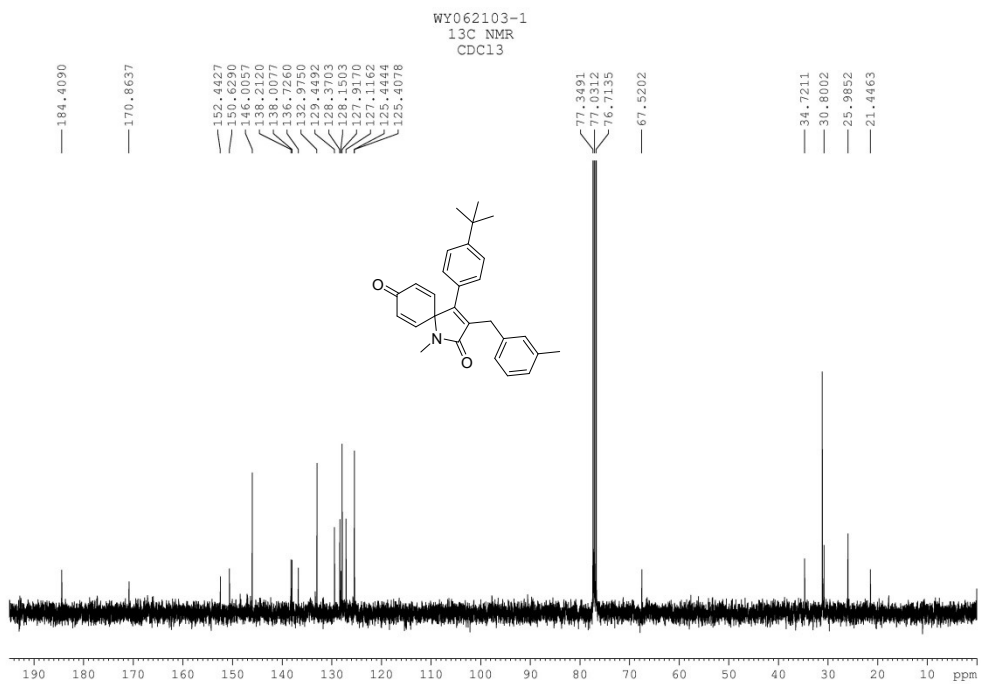



Fig. 42 <sup>13</sup>C NMR spectrum of compound 3v

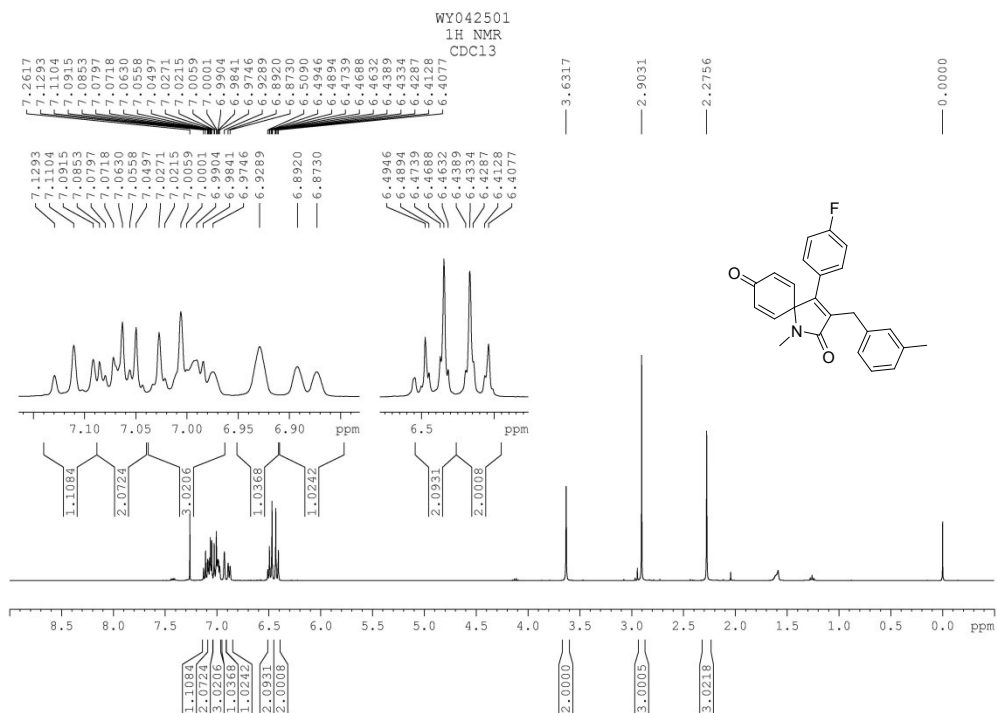

Fig. 43 <sup>1</sup>H NMR spectrum of compound 3w

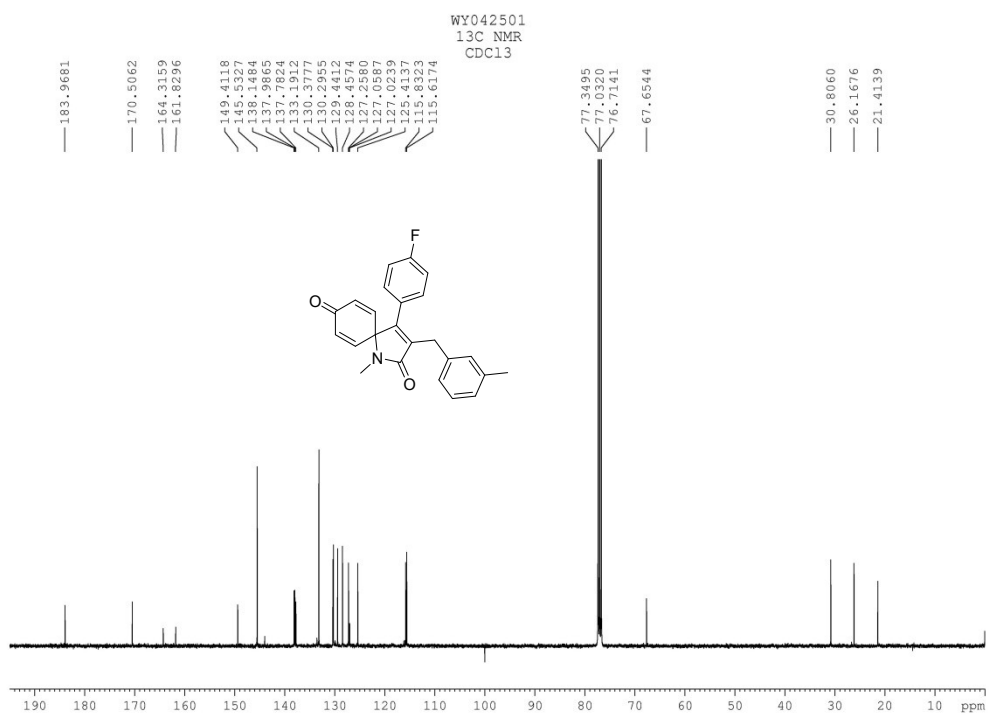



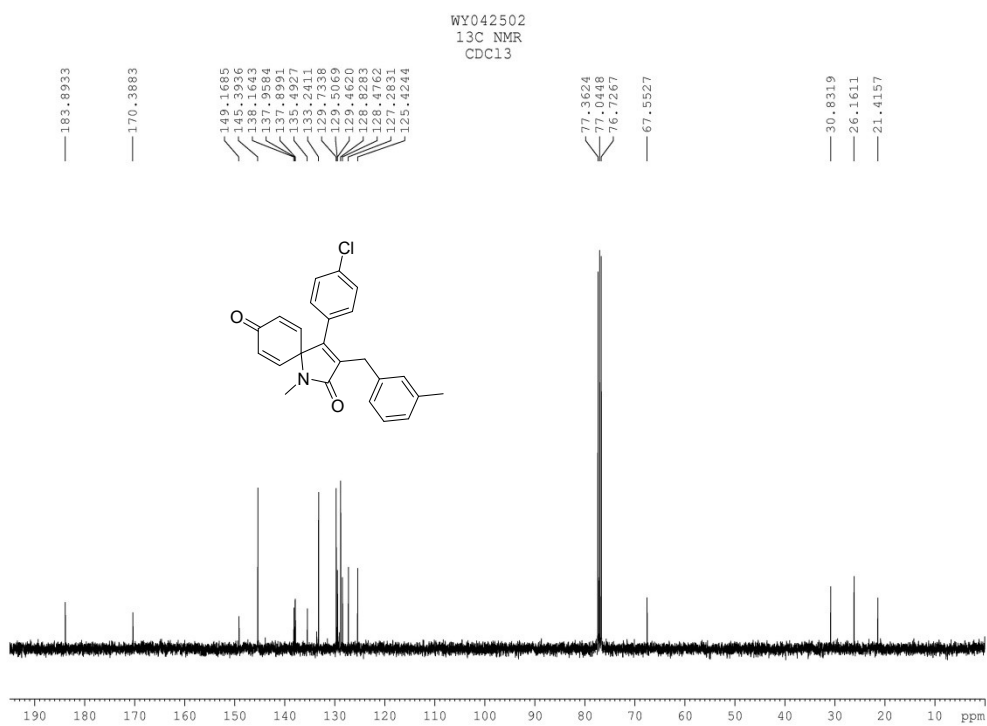

Fig. 47 <sup>13</sup>C NMR spectrum of compound 3x

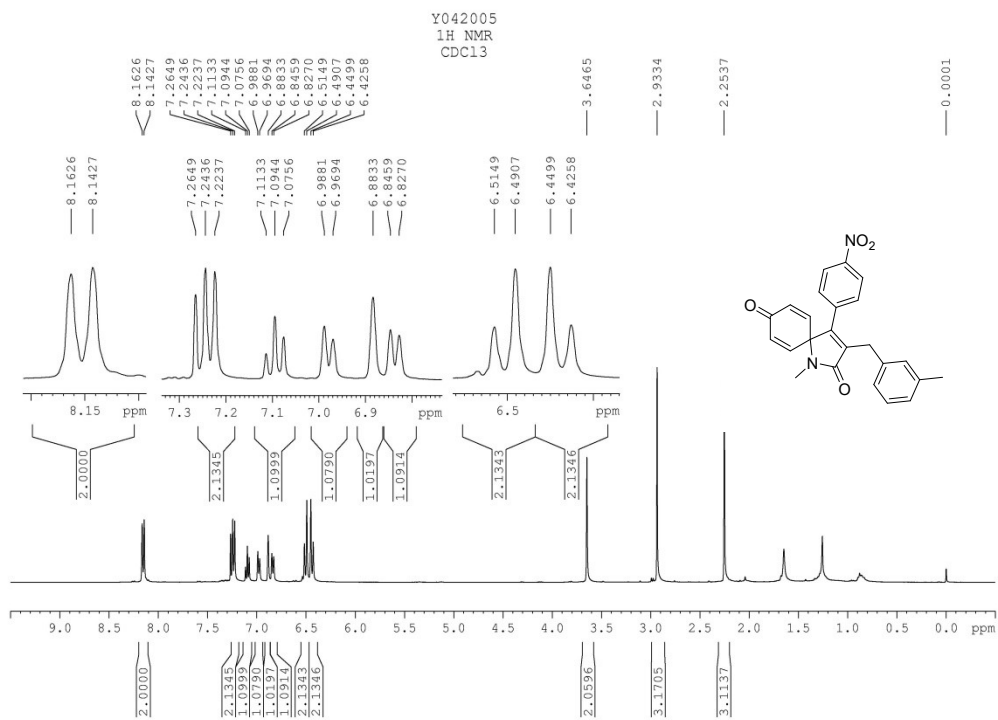

Fig. 48 <sup>1</sup>H NMR spectrum of compound 3y

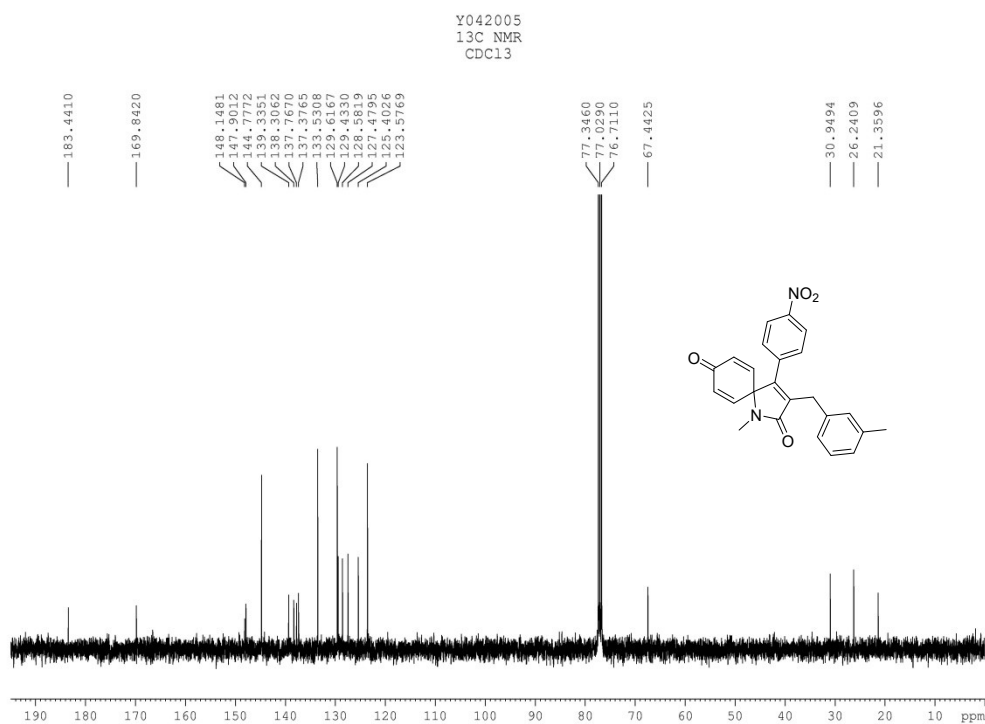

Fig. 49 <sup>13</sup>C NMR spectrum of compound 3y

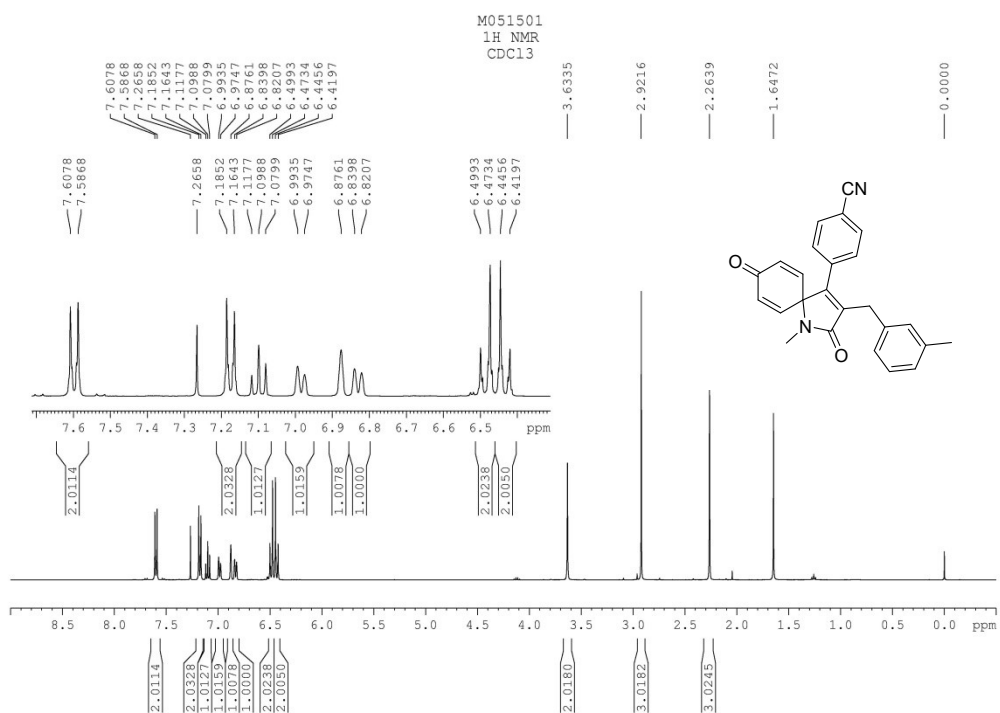

Fig. 50 <sup>1</sup>H NMR spectrum of compound 3z

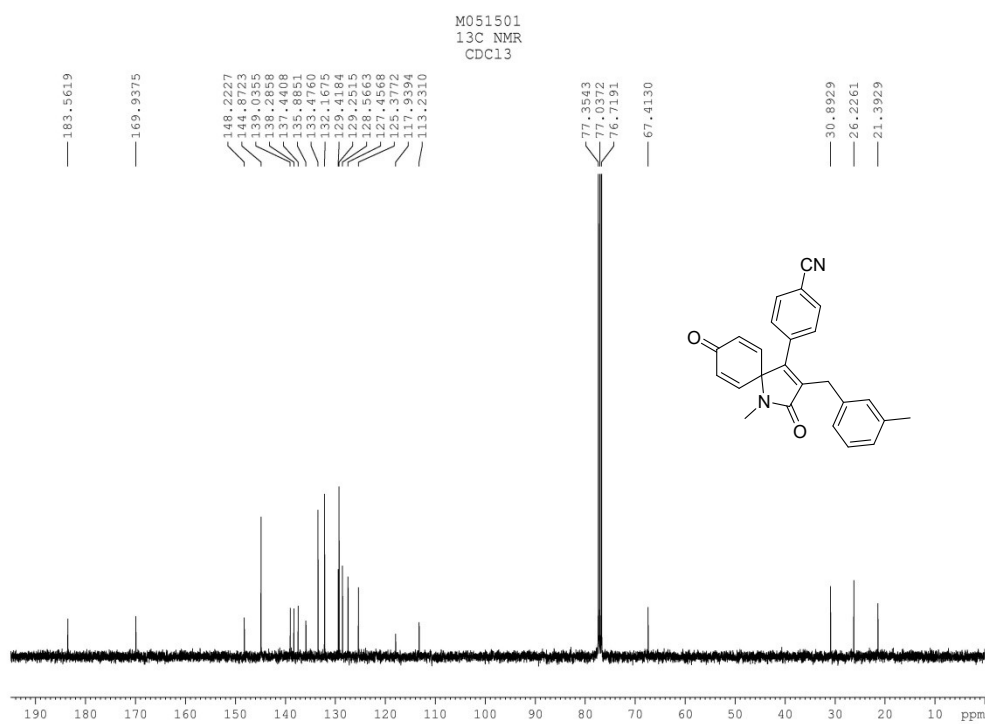

Fig. 51 <sup>13</sup>C NMR spectrum of compound 3z

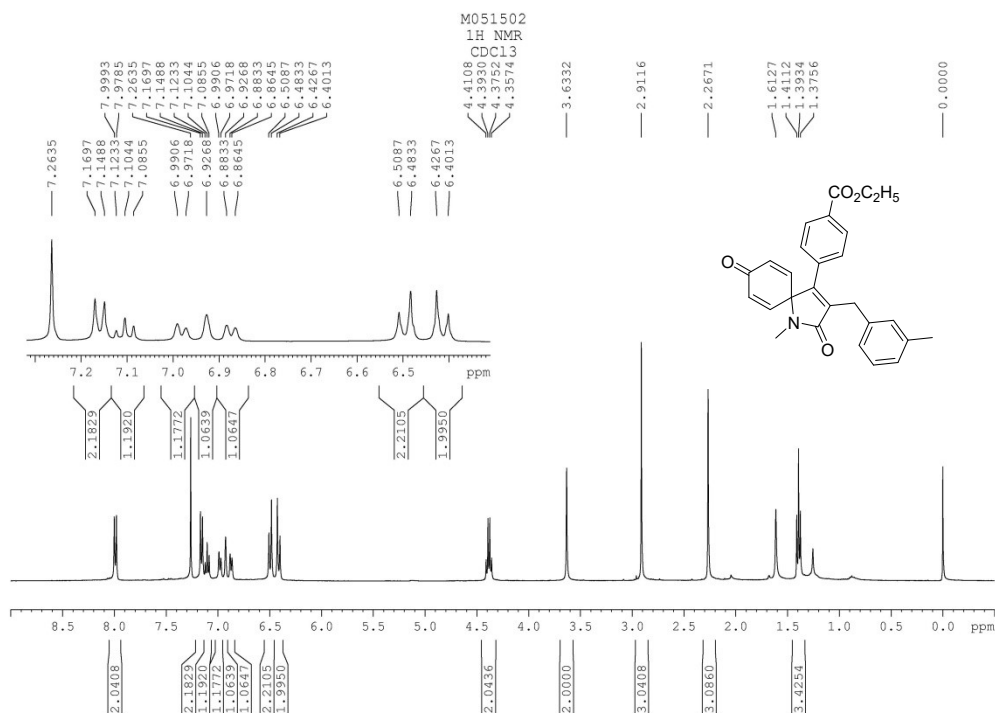

Fig. 52 <sup>1</sup>H NMR spectrum of compound 3aa

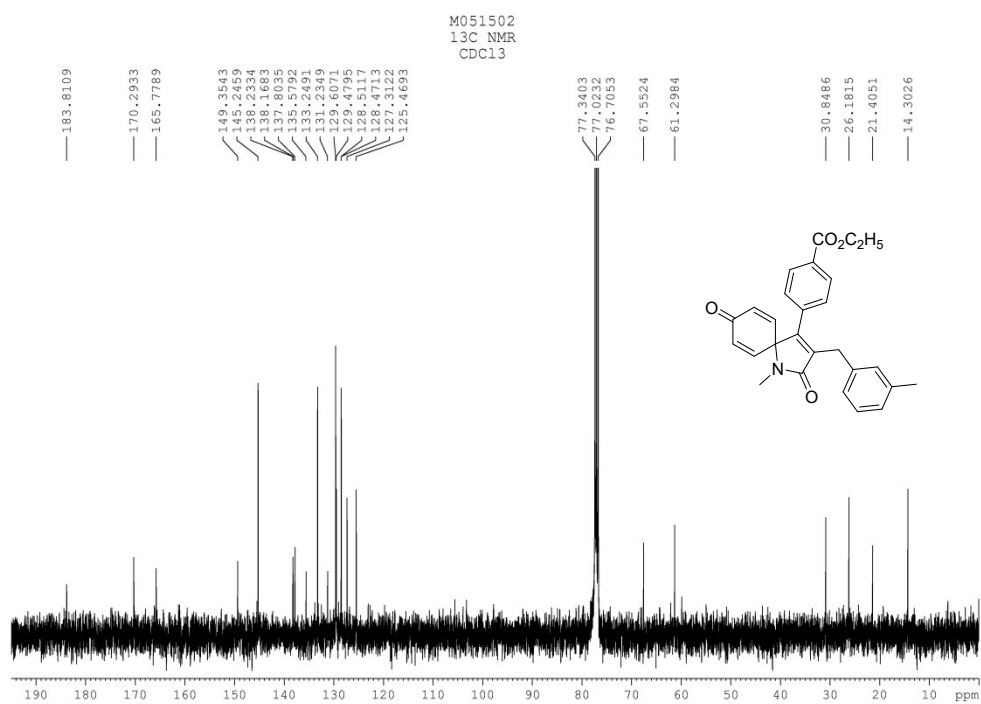

Fig. 53 <sup>13</sup>C NMR spectrum of compound 3aa

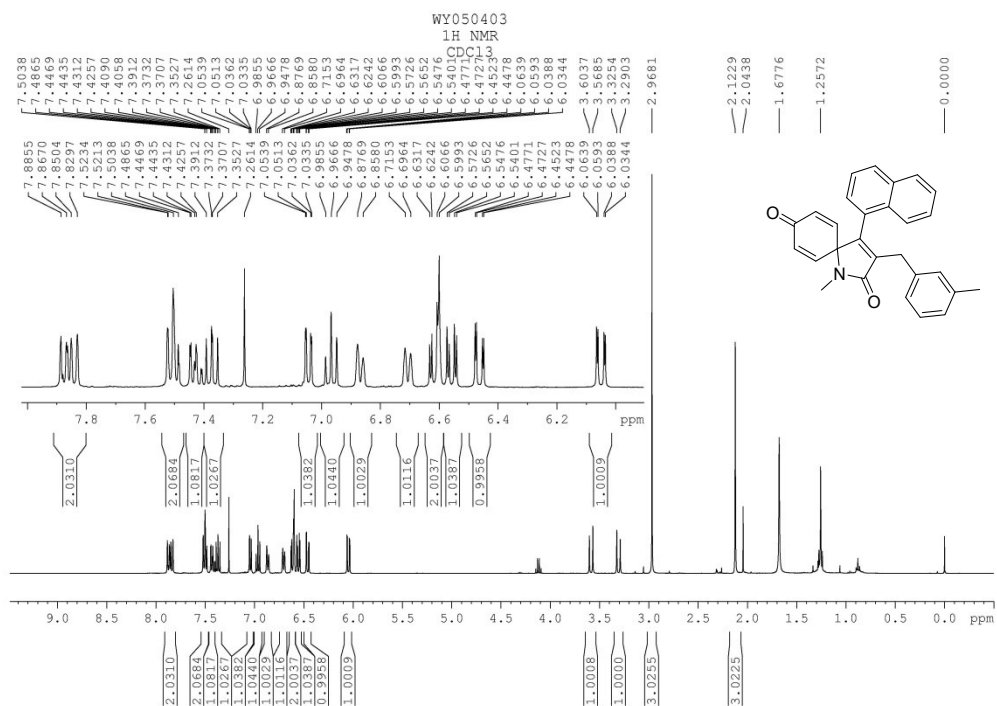

Fig. 54 <sup>1</sup>H NMR spectrum of compound 3ab

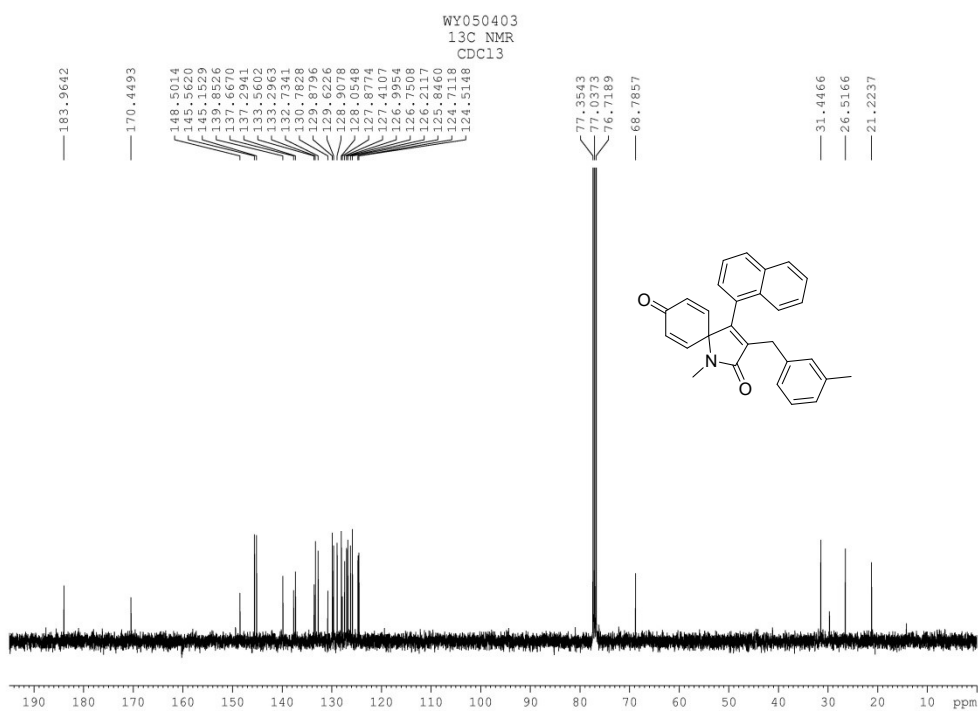

Fig. 55 <sup>13</sup>C NMR spectrum of compound 3ab

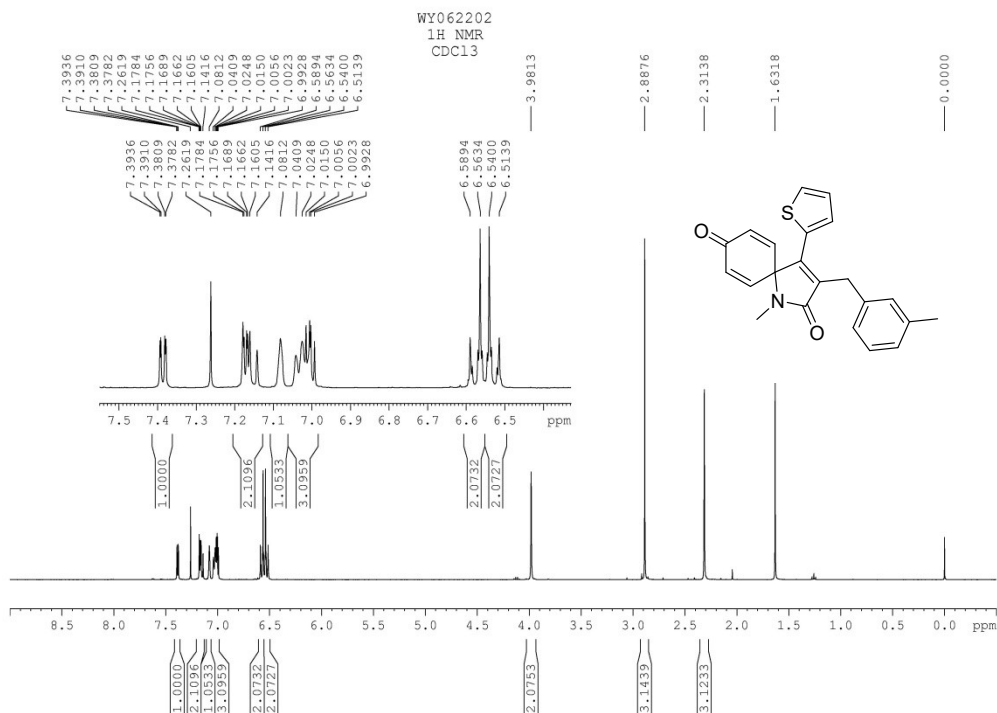

Fig. 56 <sup>1</sup>H NMR spectrum of compound 3ac

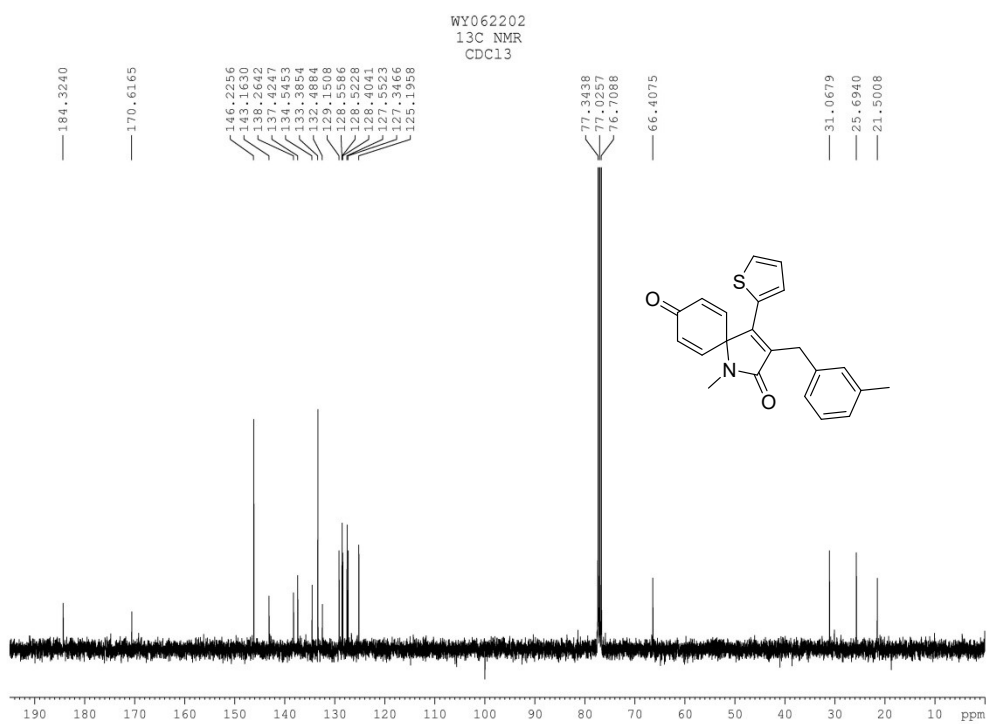

Fig. 57 <sup>13</sup>C NMR spectrum of compound 3ac

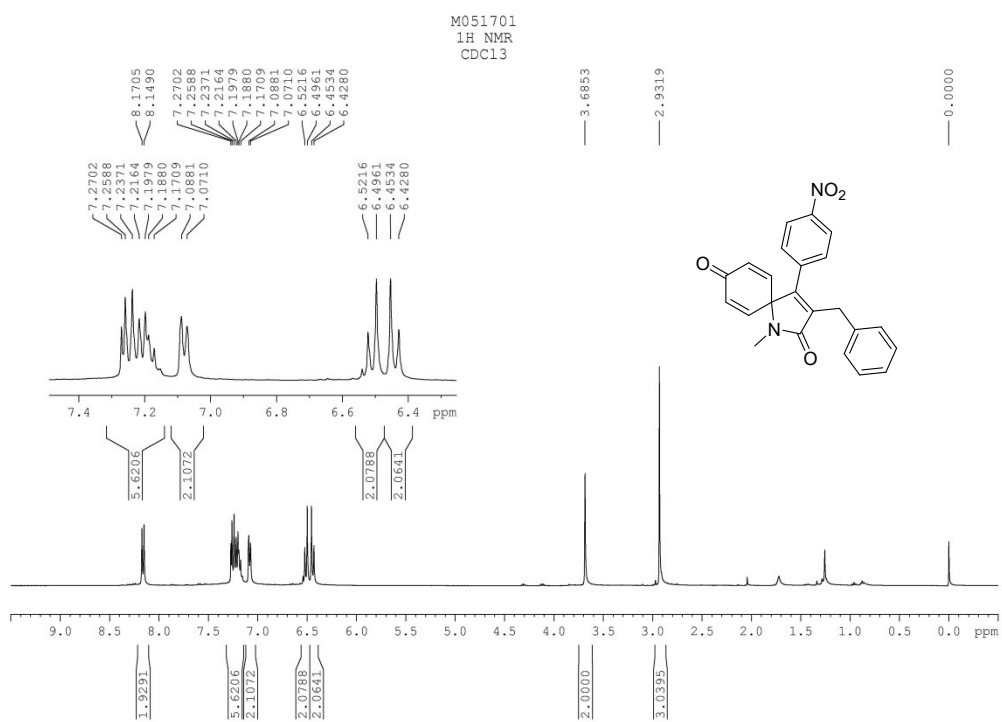

Fig. 58 <sup>1</sup>H NMR spectrum of compound 3ad



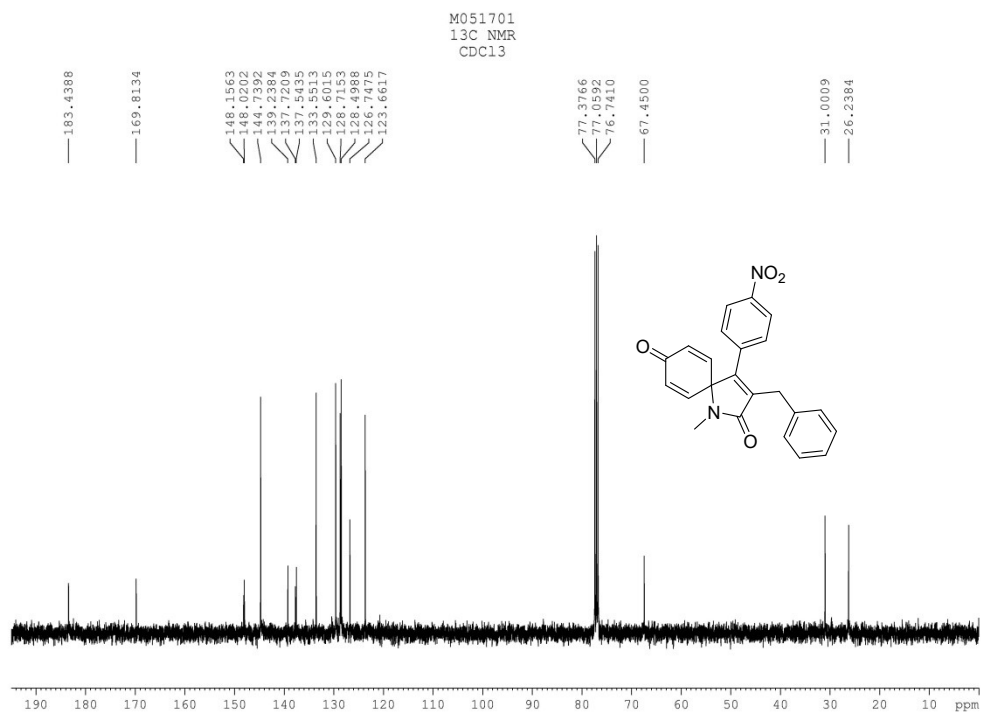

Fig. 59 <sup>13</sup>C NMR spectrum of compound 3ad

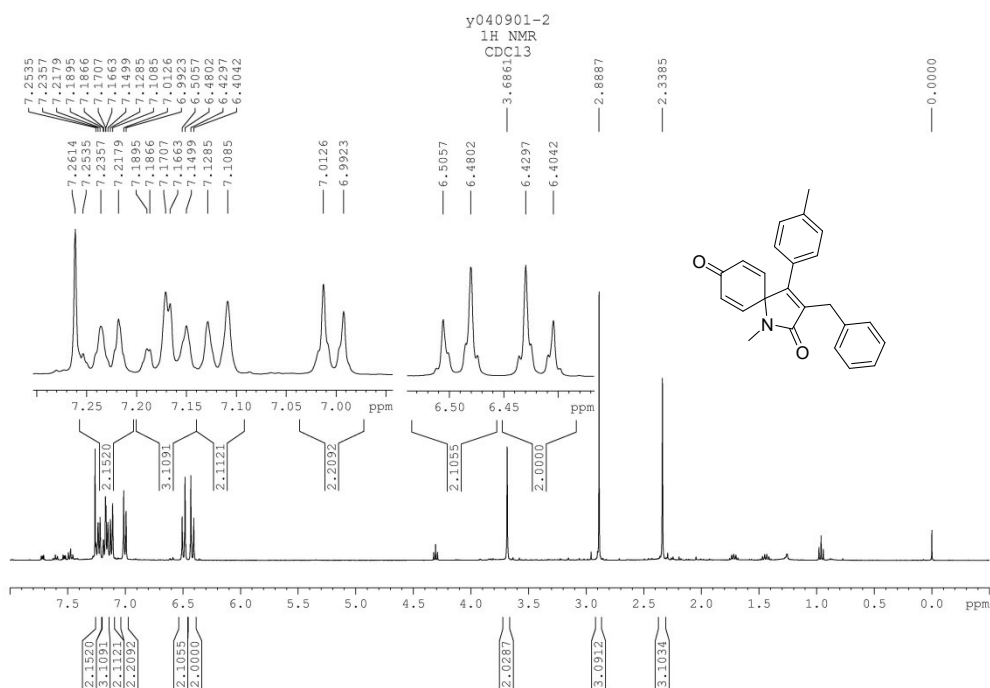

Fig. 60 <sup>1</sup>H NMR spectrum of compound 3ae

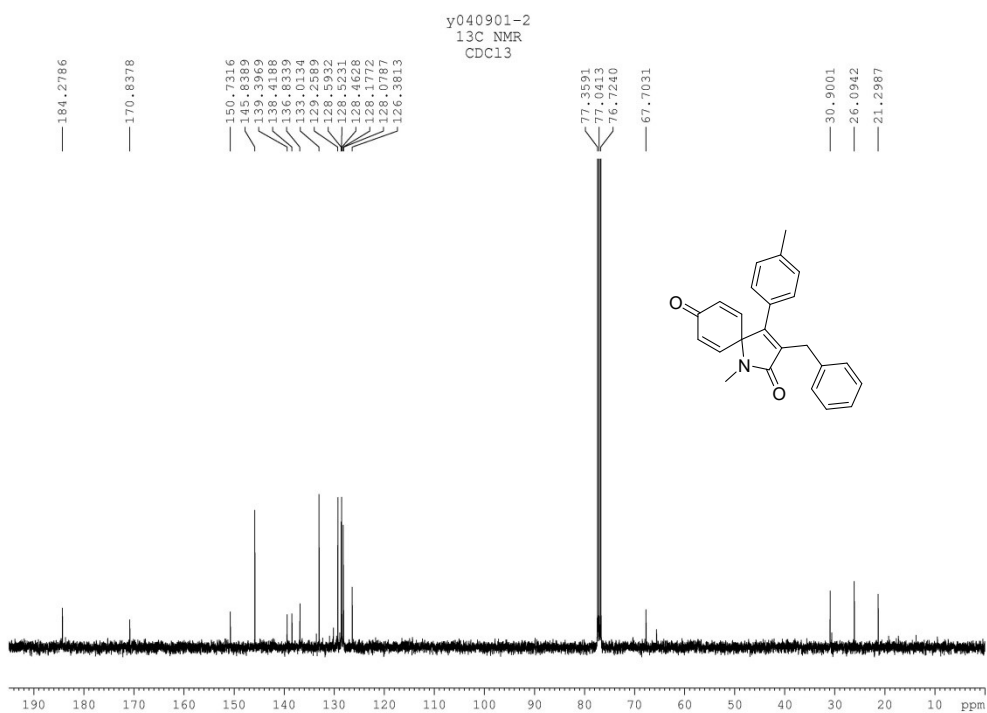

Fig. 61 <sup>13</sup>C NMR spectrum of compound 3ae

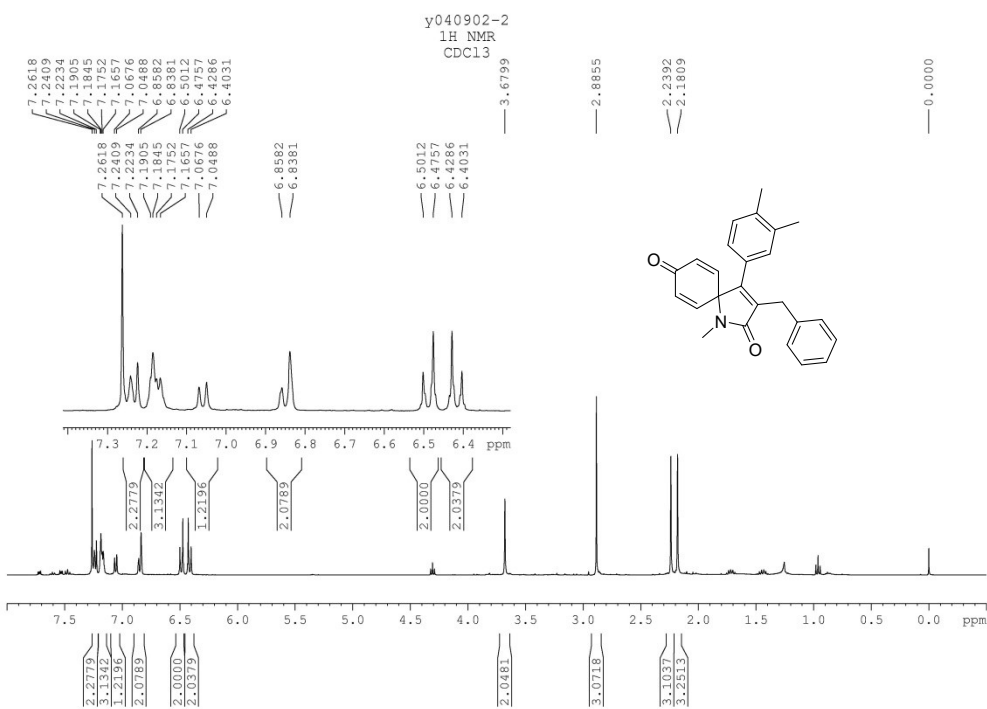

Fig. 62 <sup>1</sup>H NMR spectrum of compound 3af

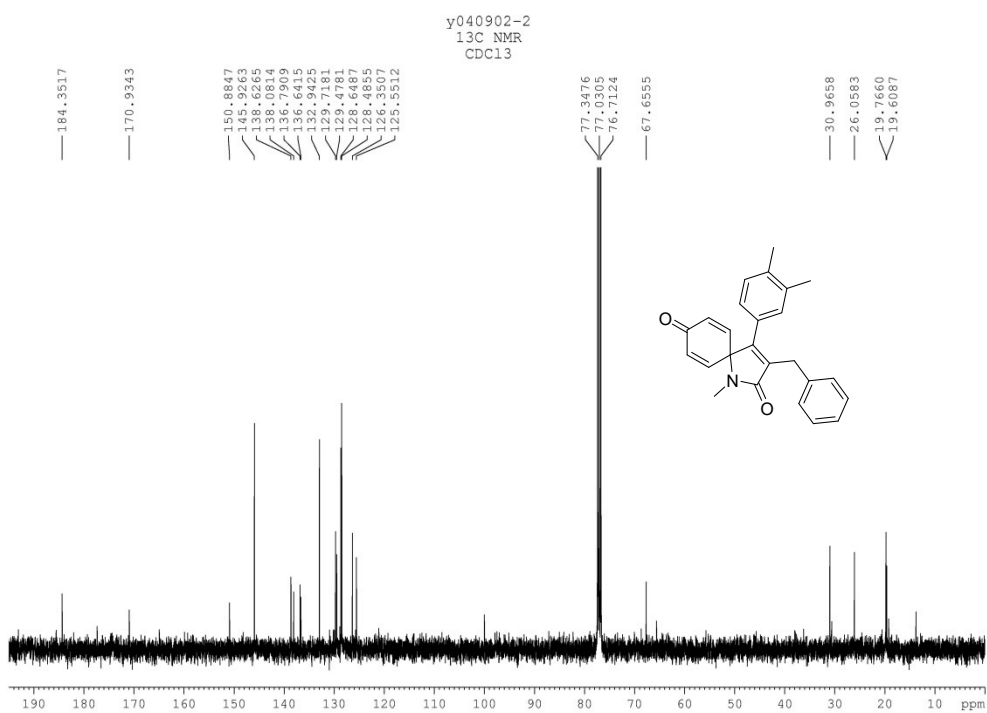

Fig. 63 <sup>13</sup>C NMR spectrum of compound 3af

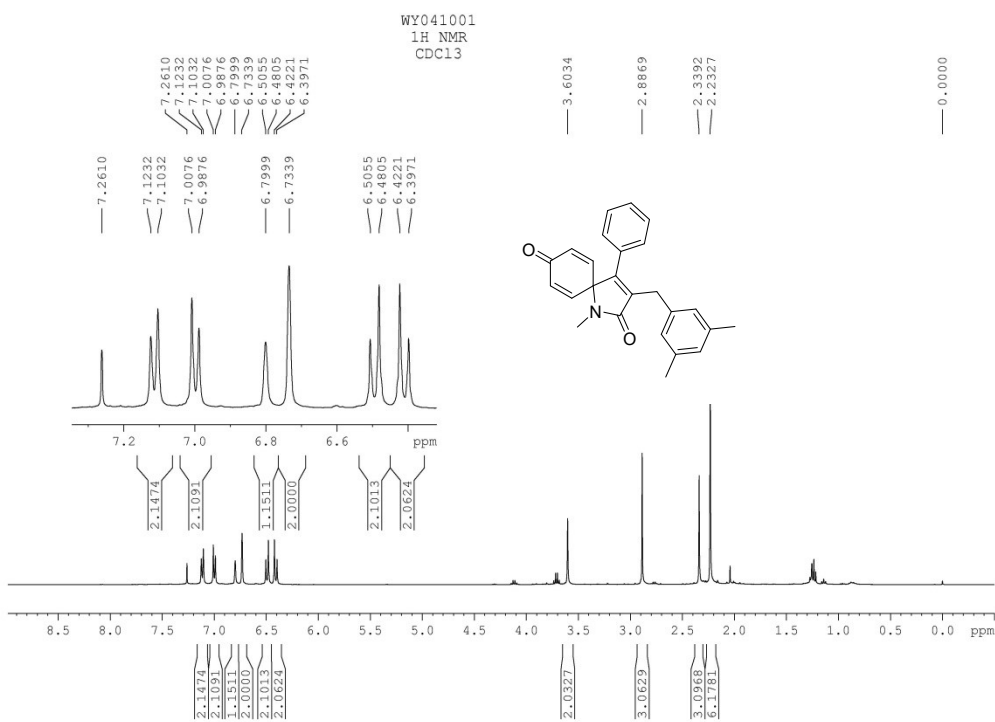

Fig. 64 <sup>1</sup>H NMR spectrum of compound 3ag

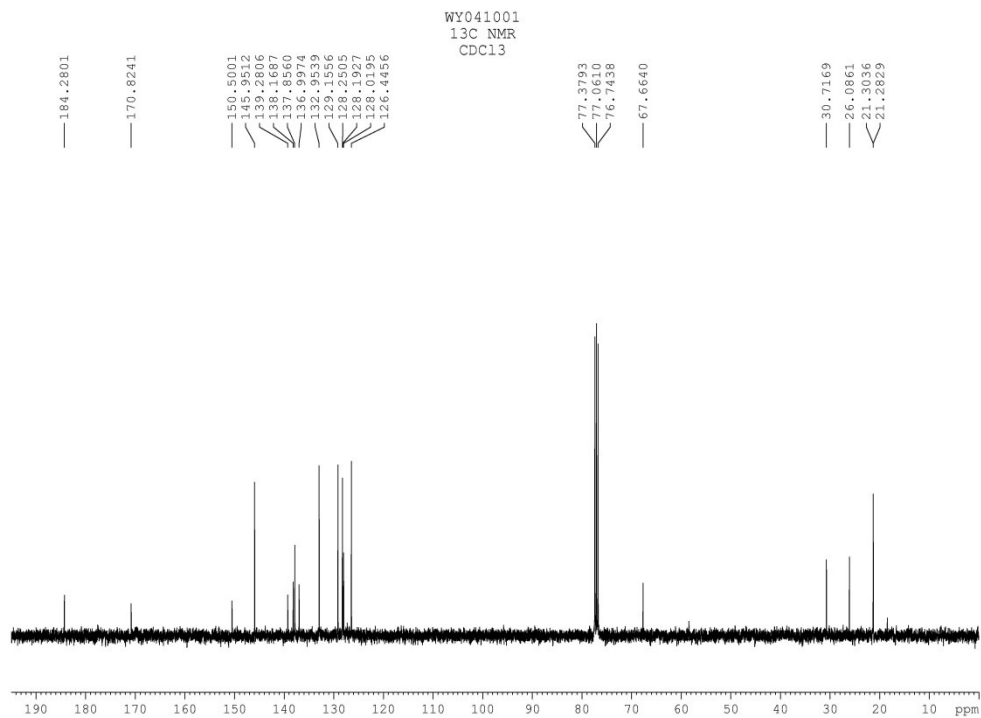

Fig. 65 <sup>13</sup>C NMR spectrum of compound 3ag

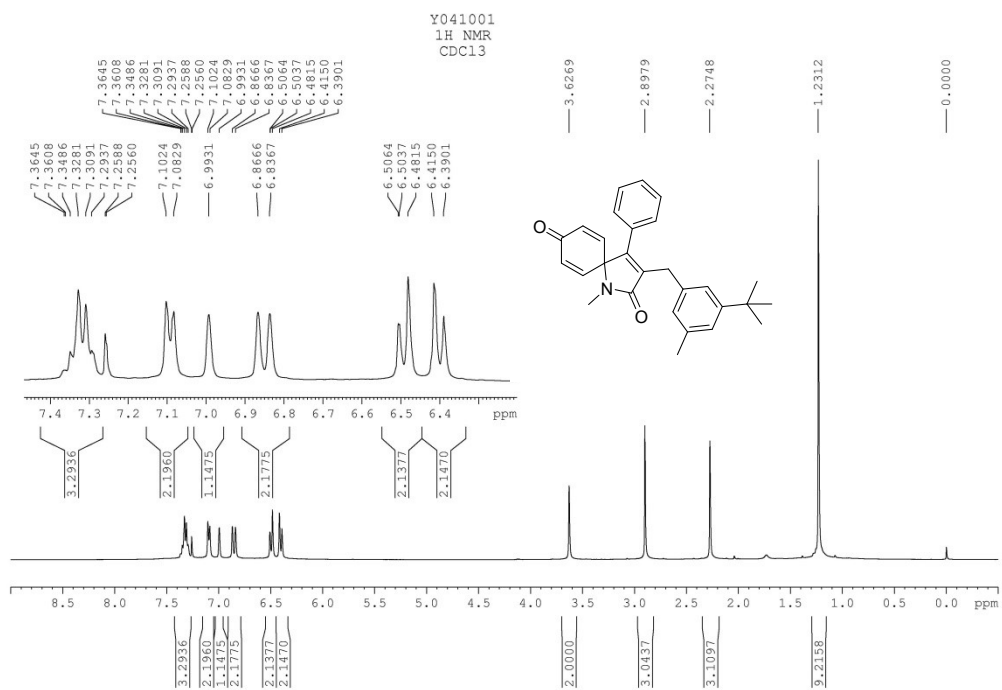

Fig. 66 <sup>1</sup>H NMR spectrum of compound 3af

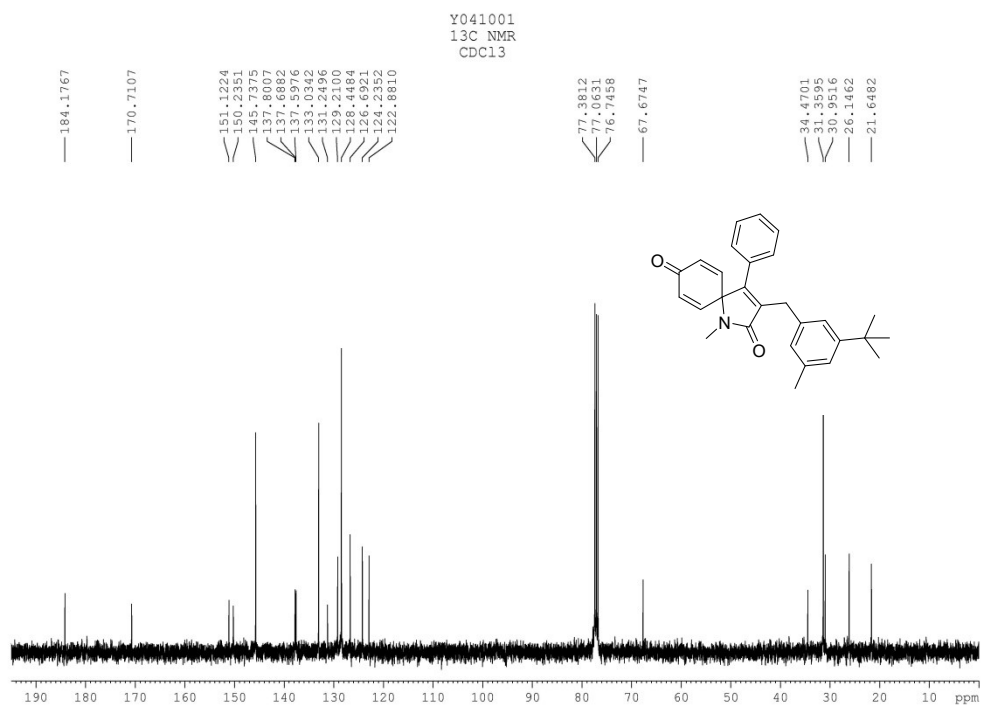

Fig. 67 <sup>13</sup>C NMR spectrum of compound 3af

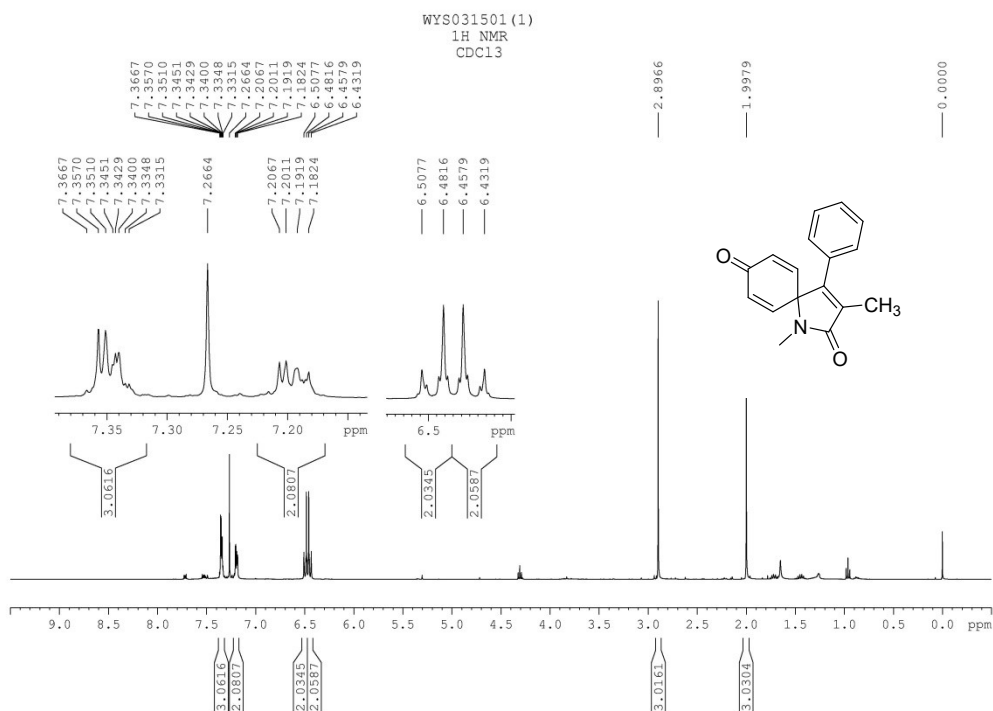

Fig. 68 <sup>1</sup>H NMR spectrum of compound 5

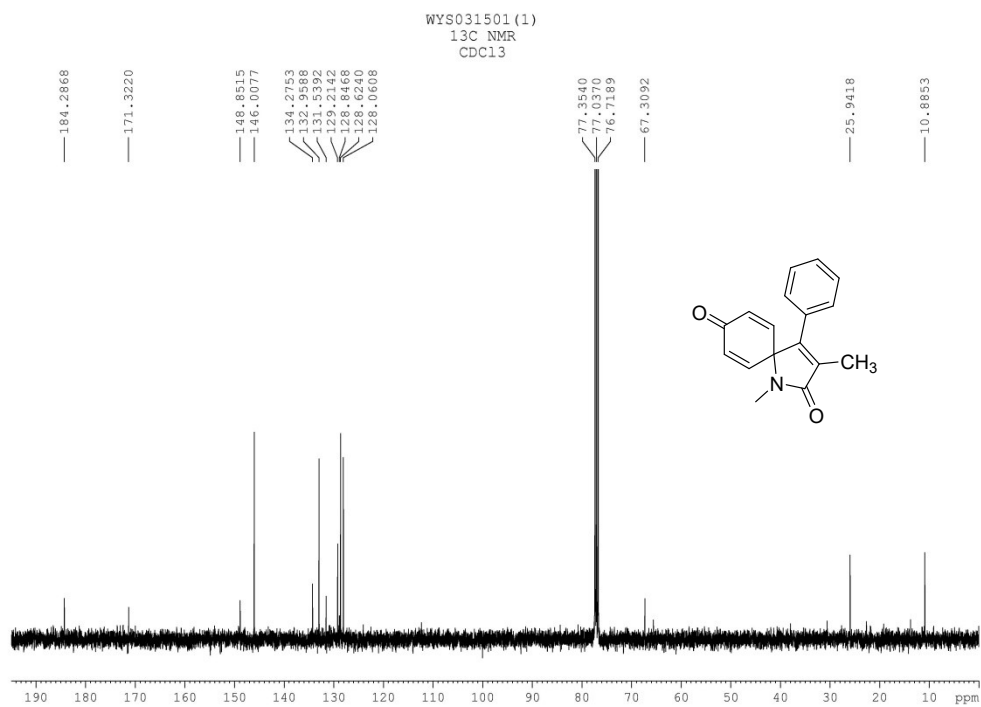

Fig. 69 <sup>13</sup>C NMR spectrum of compound 5

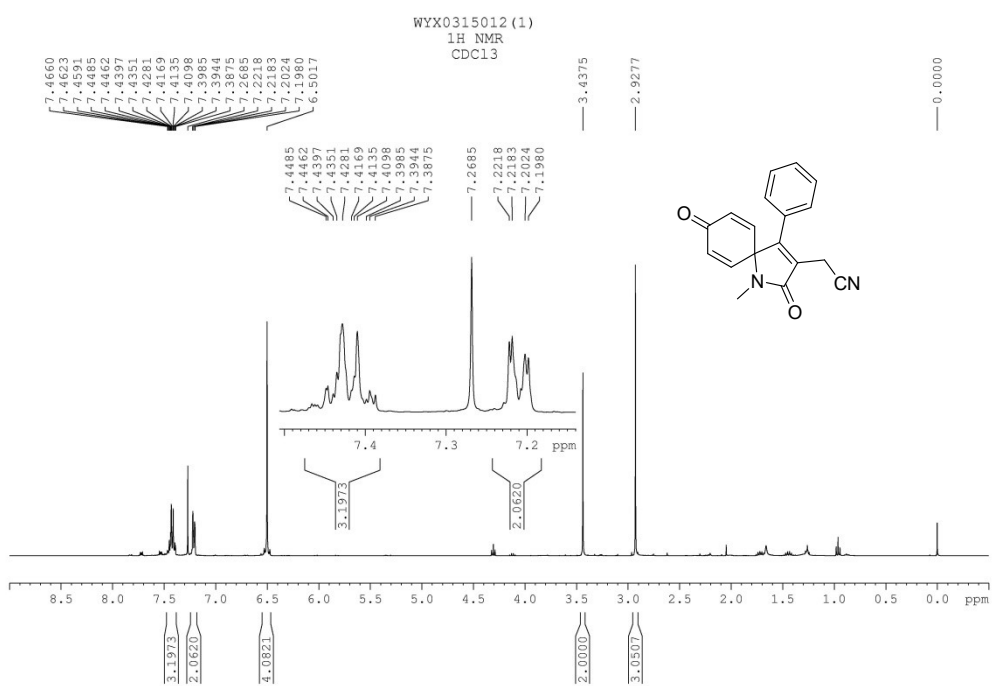

Fig. 70 <sup>1</sup>H NMR spectrum of compound 6

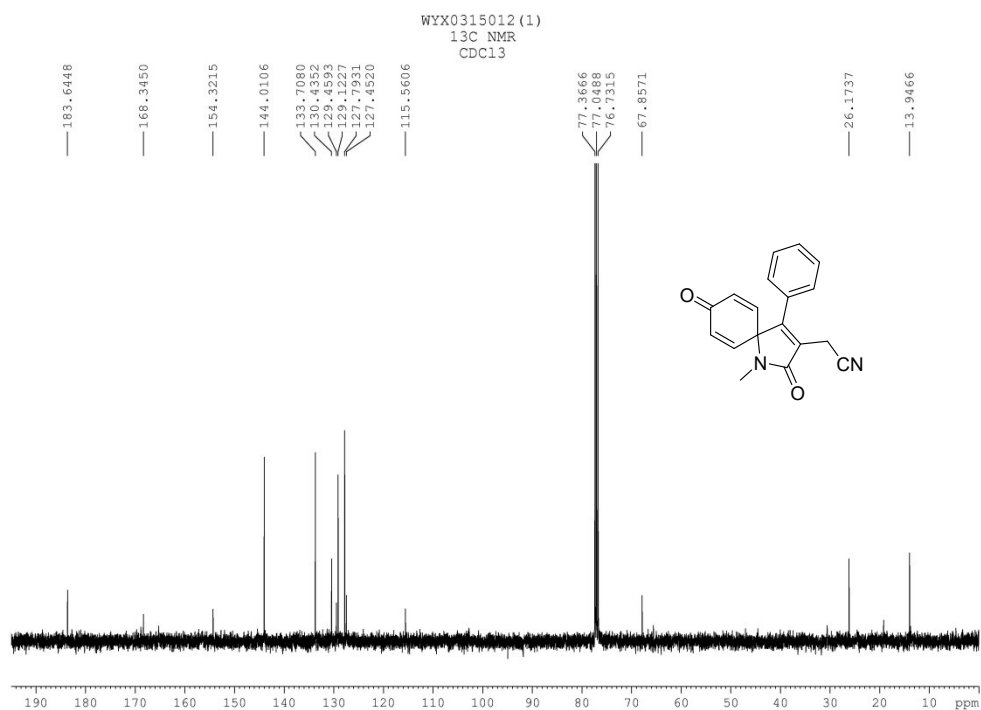

Fig. 71 <sup>13</sup>C NMR spectrum of compound 6

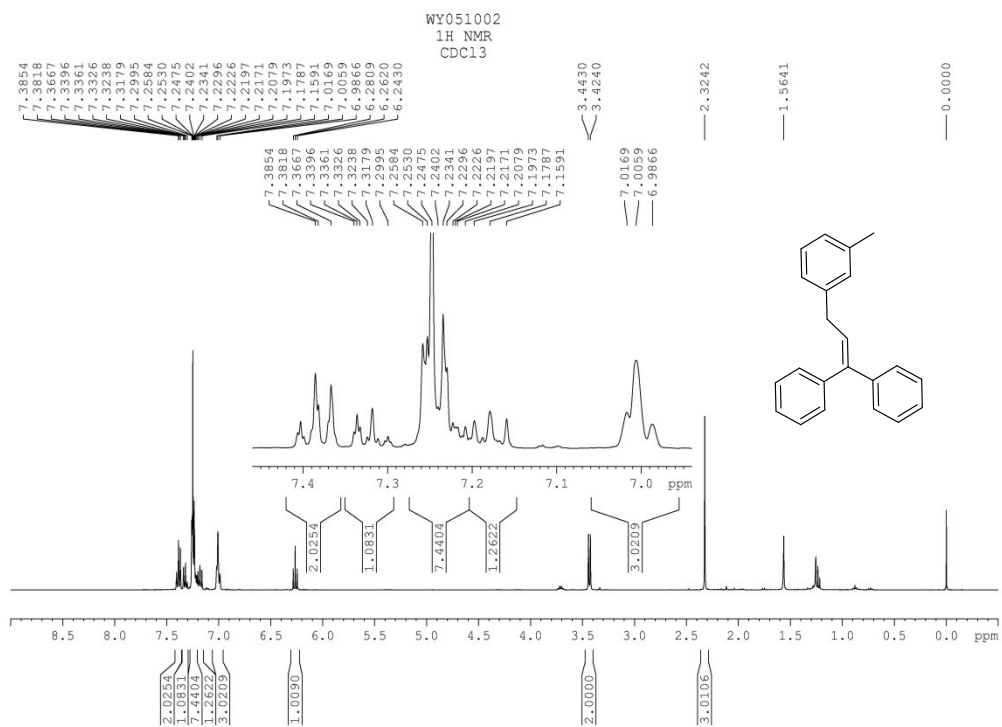

Fig. 72 <sup>1</sup>H NMR spectrum of compound 8

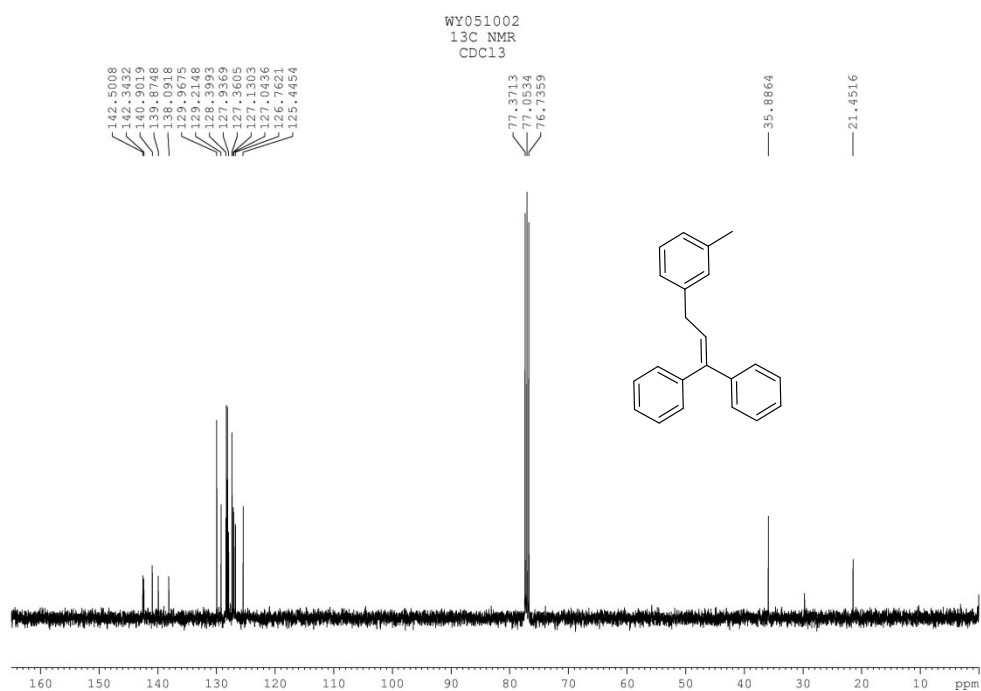

Fig. 73  $^{13}\text{C}$  NMR spectrum of compound 8

#### 4 HR MS spectrum of the adduct 7 of TEMPO and benzyl radical

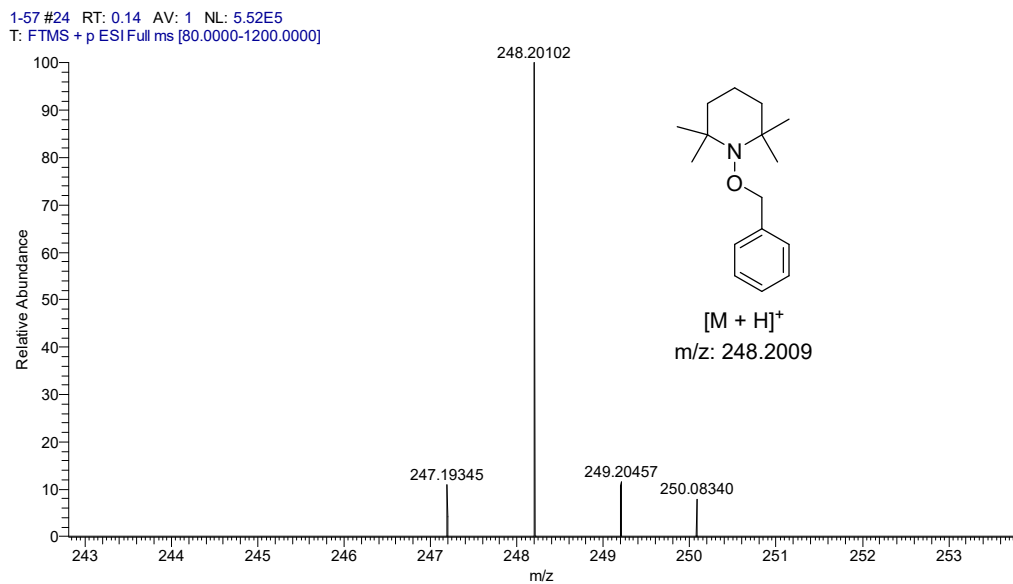

Fig. 74 HR MS spectrum of the adduct 7



## 5 HR MS spectrum of the adduct 8 of ethene-1,1-diyldibenzene and *m*-methyl benzyl radical

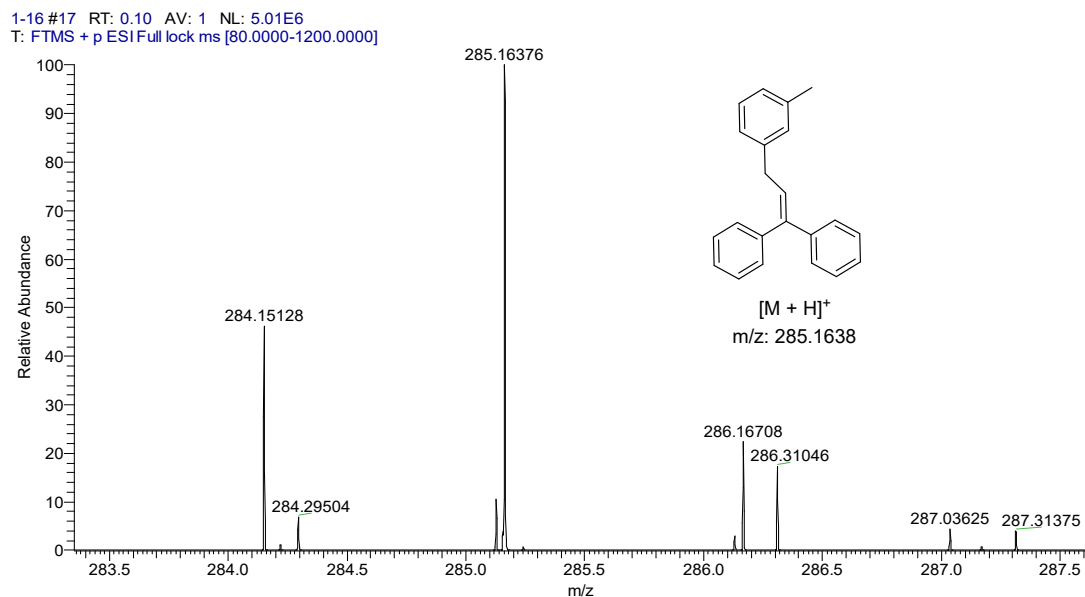

Fig. 75 HR MS spectrum of the adduct 8

## 6 Kinetic isotope effect experiments

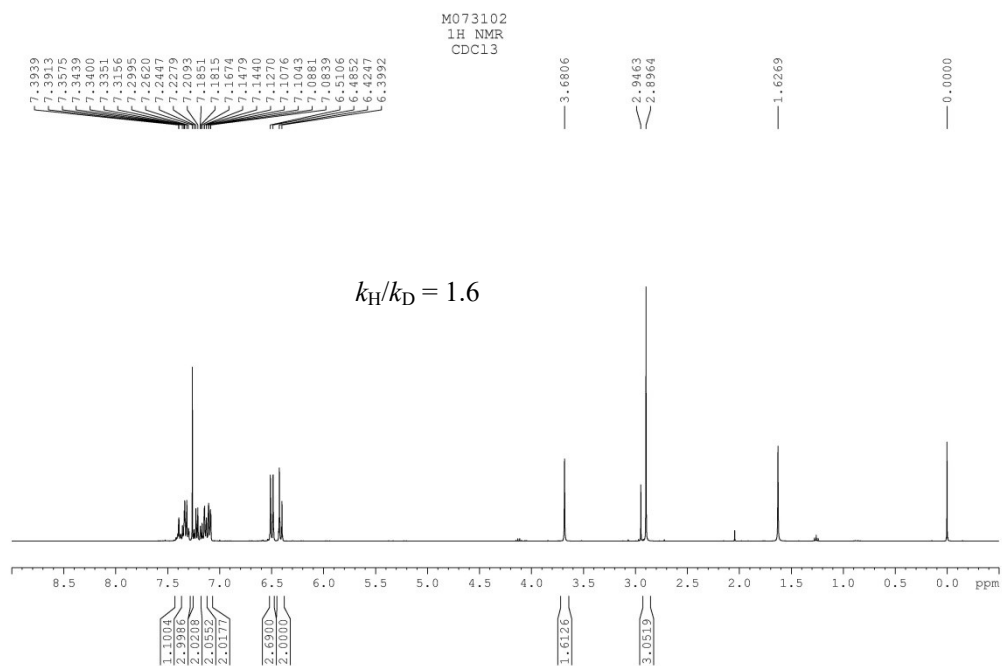

Fig. 76 Kinetic isotope effect experiment 1

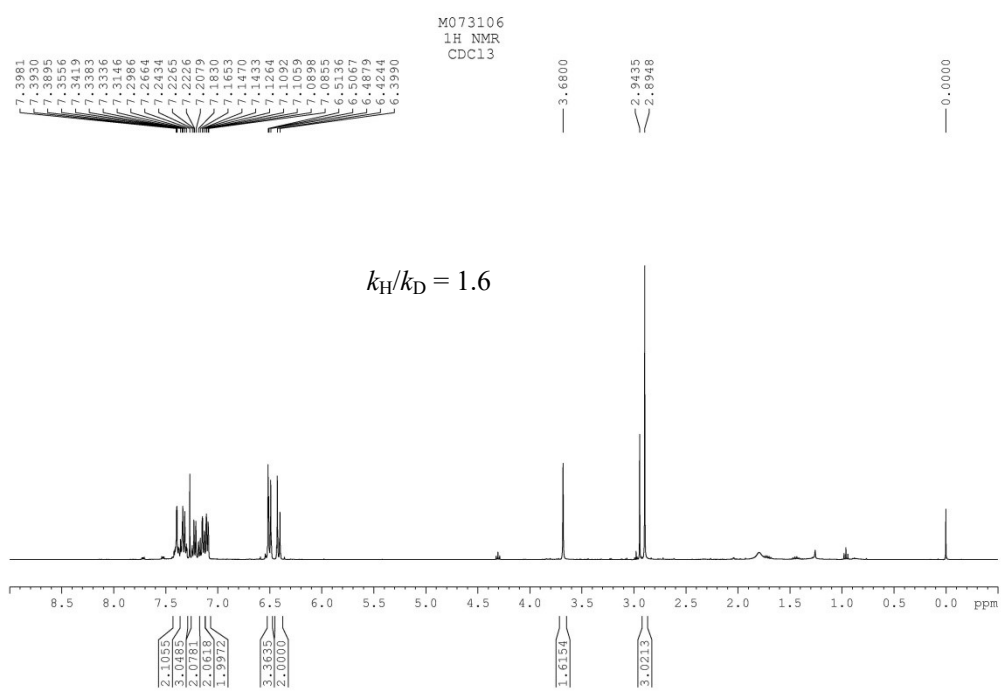

**Fig. 77** Kinetic isotope effect experiment 2
